# Supplementary material
Source: PubMed Central journal article supplement (PMC3999794)
Supplement: om400752a_si_001.pdf [file om400752a_si_001.pdf]

*Supporting Information for*

**Ferrous Carbonyl Dithiolates as Precursors to FeFe-, FeCo-, and FeMn-Dithiolates**

Maria E. Carroll, Jinzhu Chen, Danielle E. Gray, James C. Lansing, Thomas B. Rauchfuss,\*  
David Schilter, Phillip I. Volkers, and Scott R. Wilson

**Page Contents**

- S3. Figure S1.  $^1\text{H}$  NMR spectrum of  $\text{Fe}(\text{edt})(\text{CO})_2(\text{dppv})$  (**1a**).  
S3. Figure S2.  $^{31}\text{P}$  NMR spectrum of **1a**.  
S4. Figure S3. IR spectrum of **1a**.  
S5. Figure S4.  $^1\text{H}$  NMR spectrum of  $\text{Fe}(\text{edt})(\text{CO})_2(\text{dppe})$  (**1b**).  
S6. Figure S5.  $^{31}\text{P}$  NMR spectrum of **1b**.  
S7. Figure S6. IR spectrum of **1b**.  
S8. Figure S7.  $^1\text{H}$  NMR spectrum of  $\text{Fe}(\text{pdt})(\text{CO})_2(\text{dppv})$  (**1c**).  
S9. Figure S8.  $^{31}\text{P}$  NMR spectrum of **1c**.  
S10. Figure S9. IR spectrum of **1c**.  
S11. Figure S10.  $^1\text{H}$  NMR spectrum of  $\text{Fe}(\text{pdt})(\text{CO})_2(\text{dppe})$  (**1d**).  
S12. Figure S11.  $^{31}\text{P}$  NMR spectrum of **1d**.  
S12. Figure S12. IR spectra of **1d**.  
S13. Figure S13.  $^1\text{H}$  NMR spectrum of  $\text{Fe}(\text{pdt})(\text{CO})_2(\text{dpbbz})$  (**1e**).  
S14. Figure S14.  $^{31}\text{P}$  NMR spectrum of **1e**.  
S14. Figure S15. IR spectrum of **1e**.  
S15. Figure S16.  $^1\text{H}$  NMR spectrum of  $\text{Fe}(\text{pdt})(\text{CO})_2(\text{dcpe})$  (**1f**).  
S15. Figure S17.  $^{31}\text{P}$  NMR spectrum of **1f**.  
S16. Figure S18. IR spectrum of **1f**.  
S17. Figure S19.  $^1\text{H}$  NMR spectrum of  $\text{Fe}(\text{Me}_2\text{pdt})(\text{CO})_2(\text{dppe})$  (**1g**).  
S17. Figure S20.  $^{31}\text{P}$  NMR spectrum of **1g**.  
S18. Figure S21. IR spectrum of **1g**.  
S18. Figure S22. Positive ion ESI mass spectrum of  $^{57}\text{Fe}_2\text{I}_4(\text{PrOH})_4$ .  
S19. Figure S23. Positive ion ESI mass spectrum of **1d** and  $^{57}\text{1d}$ .  
S19. Figure S24. IR spectrum of  $^{57}\text{1d}$ .  
S20. Figure S25. IR spectra for  $(\text{bda})\text{Fe}(\text{CO})_3 + \text{1d}$ .  
S20. Figure S26.  $^{31}\text{P}$  NMR spectrum of  $\text{Fe}_2(\text{pdt})(\text{CO})_4(\text{dcpe})$  (**2f**).  
S21. Figure S27. IR spectra of  $\text{Fe}_2(\text{pdt})(\text{CO})_4(\text{dcpe})$  (**2f**).  
S22. Figure S28.  $^1\text{H}$  NMR spectrum of  $[(\text{CO})_3\text{Mn}(\text{pdt})\text{Fe}(\text{CO})_2(\text{dppe})]\text{BF}_4$  ( $[\text{3d}(\text{CO})]\text{BF}_4$ ).  
S22. Figure S29. IR spectrum of  $[\text{3d}(\text{CO})]\text{BF}_4$  and **3d**.  
S23. Figure S30. CV of  $[\text{3d}(\text{CO})]\text{BF}_4$ .  
S23. Figure S31. CV of  $[\text{3d}(\text{CO})]\text{BF}_4$  at  $-78\text{ }^\circ\text{C}$ .  
S24. Figure S32. CV of  $[\text{3d}(\text{CO})]\text{BF}_4$ .  
S24. Figure S33. CV of  $(\text{CO})_3\text{Mn}(\text{pdt})\text{Fe}(\text{CO})(\text{dppe})$  and  $[\text{3d}(\text{CO})]\text{BF}_4$ .  
S25. Figure S34.  $^{31}\text{P}$  NMR spectra for **1a** +  $[(\text{acenaphthene})\text{Mn}(\text{CO})_3]\text{BF}_4$ .  
S26. Figure S35.  $^{31}\text{P}$  NMR spectra for **1e** +  $[(\text{acenaphthene})\text{Mn}(\text{CO})_3]\text{BF}_4$ .  
S27. Figure S36.  $^{31}\text{P}$  NMR spectra for **1f** +  $[(\text{acenaphthene})\text{Mn}(\text{CO})_3]\text{BF}_4$ .  
S28. Figure S37. EPR spectrum of  $(\text{CO})_3\text{Mn}(\text{pdt})\text{Fe}(\text{CO})(\text{dppe})$  (**3d**).  
S29. Figure S38.  $^1\text{H}$  NMR spectrum of  $(\text{CO})_3\text{Mn}(\text{pdt})(\mu\text{-H})\text{Fe}(\text{CO})(\text{dppe})$  (**H3d**).  
S29. Figure S39.  $^{31}\text{P}$  NMR spectrum of **H3d**.

- S30. Figure S40.  $^1\text{H}$  NMR high field spectrum for **H3d** +  $[\text{H}(\text{Et}_2\text{O})_2]\text{BAr}^{\text{F}}_4$ .
- S31. Figure S41.  $^{31}\text{P}$  NMR spectrum for **H3d** + 1 equiv  $[\text{H}(\text{Et}_2\text{O})_2]\text{BAr}^{\text{F}}_4$ .
- S32. Figure S42.  $^{31}\text{P}$  NMR spectrum for **H3d** + 2 equiv  $[\text{H}(\text{Et}_2\text{O})_2]\text{BAr}^{\text{F}}_4$ .
- S33. Figure S43. IR spectra for **H3d** before and after oxidation.
- S34. Figure S44. CV of **H3d**.
- S35. Figure S45. CV of **H3d** at various scan rates.
- S36. Figure S46. EPR spectrum of  $[\text{H3d}]\text{BF}_4$ .
- S36. Figure S47.  $^1\text{H}$  NMR spectrum of  $\text{CpCo}(\text{pdt})\text{Fe}(\text{CO})(\text{dppe})$  (**4d**).
- S37. Figure S48. Variable temperature  $^{31}\text{P}$  NMR spectra of **4d**.
- S38. Figure S49.  $^{31}\text{P}$  NMR spectrum of the reaction of **1d** and  $\text{CpCo}(\text{CO})\text{I}_2$ .
- S39. Figure S50. IR spectrum of **4d**.
- S40. Figure S51.  $^1\text{H}$  NMR spectra for low temperature protonation of **4d**.
- S41. Figure S52. CV of **4d**.
- S42. Figure S53.  $^1\text{H}$  NMR spectrum of  $\text{CpCo}(\text{edt})\text{Fe}(\text{CO})(\text{dppv})$  (**4a**).
- S42. Figure S54. IR spectrum of **4a**.

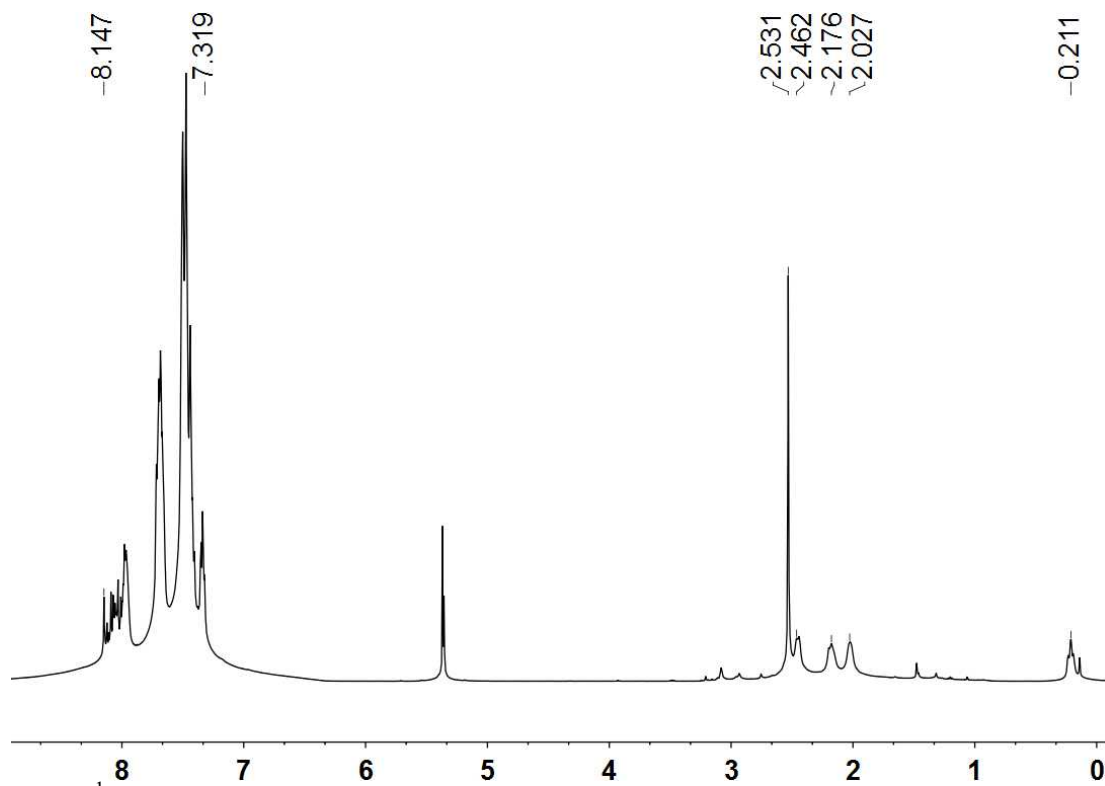

**Figure S1.** <sup>1</sup>H NMR spectrum (500 MHz) of Fe(edt)(CO)<sub>2</sub>(dppv) (**1a**) in CD<sub>2</sub>Cl<sub>2</sub> solution.

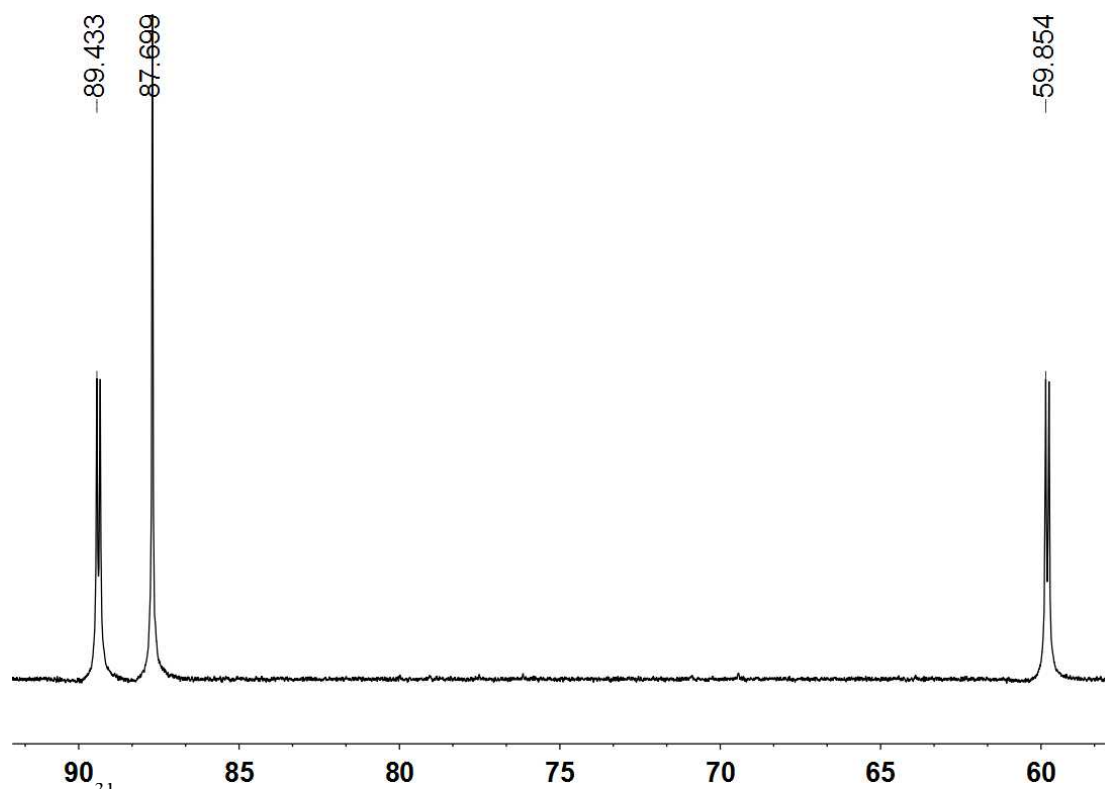

**Figure S2.** <sup>31</sup>P NMR spectrum (202 MHz) of Fe(edt)(CO)<sub>2</sub>(dppv) (**1a**) in CD<sub>2</sub>Cl<sub>2</sub> solution.

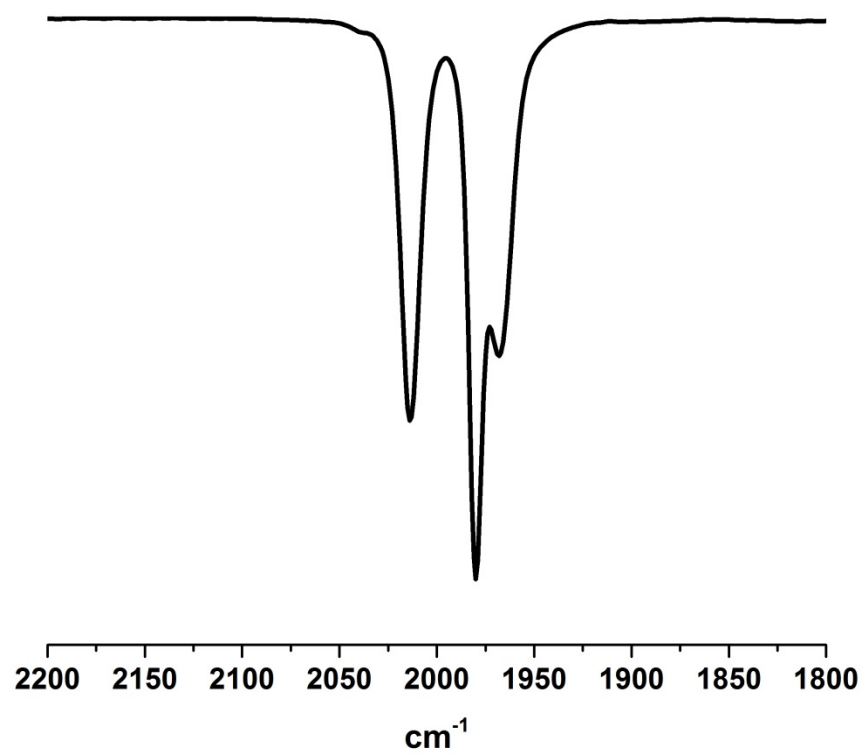

**Figure S3.** IR spectrum of  $\text{Fe}(\text{edt})(\text{CO})_2(\text{dppv})$  (**1a**) in THF solution.

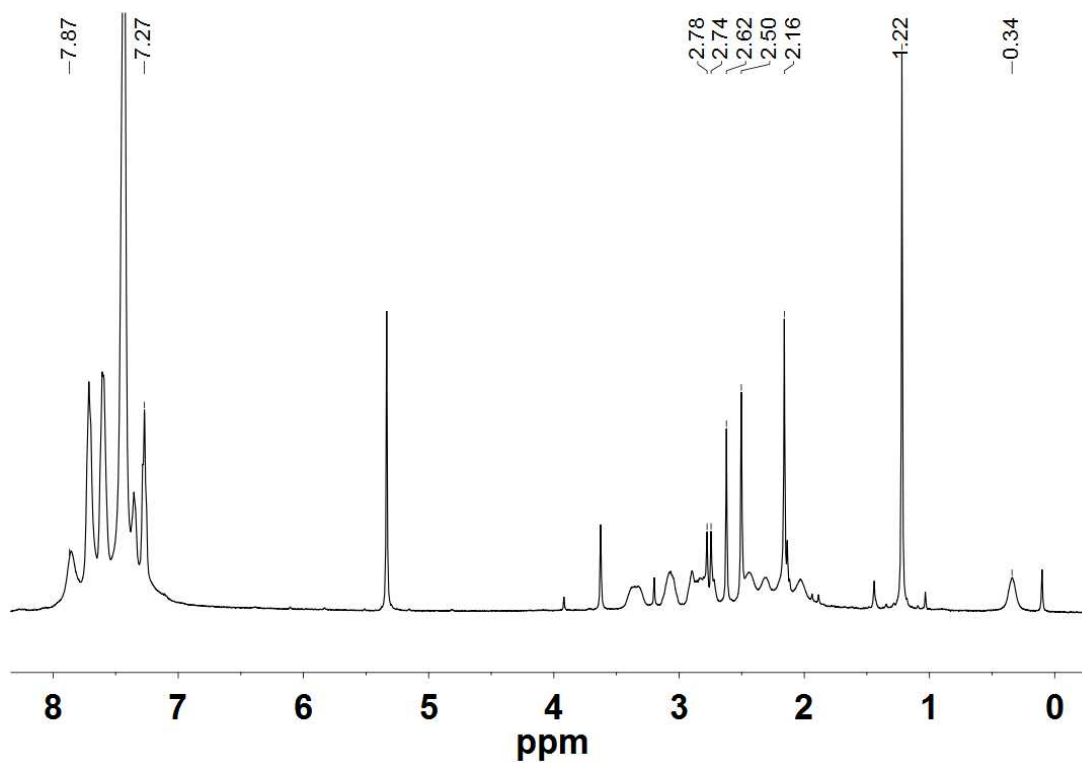

**Figure S4.**  $^1\text{H}$  NMR spectrum (500 MHz) of  $\text{Fe}(\text{edt})(\text{CO})_2(\text{dppe})$  (**1b**) in  $\text{CD}_2\text{Cl}_2$  solution.

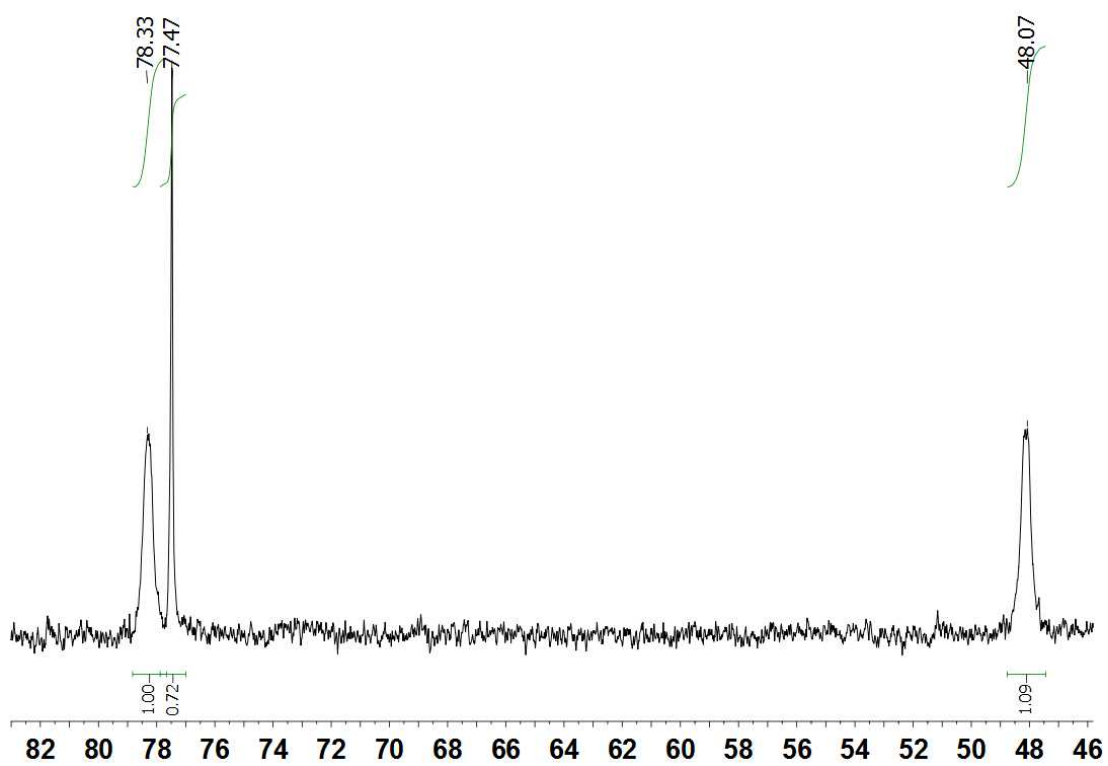

**Figure S5.**  $^{31}\text{P}$  NMR spectrum (202 MHz) of  $\text{Fe}(\text{edt})(\text{CO})_2(\text{dppe})$  (**1b**) in  $\text{CD}_2\text{Cl}_2$  solution.

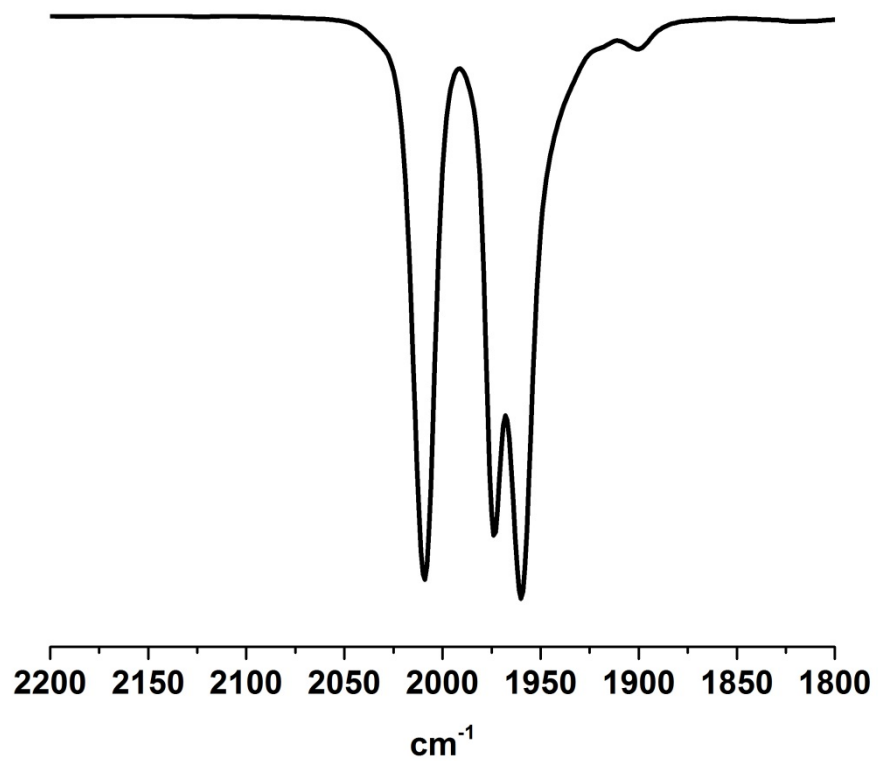

**Figure S6.** IR spectrum of Fe(edt)(CO)<sub>2</sub>(dppe) (**1b**) in THF solution.

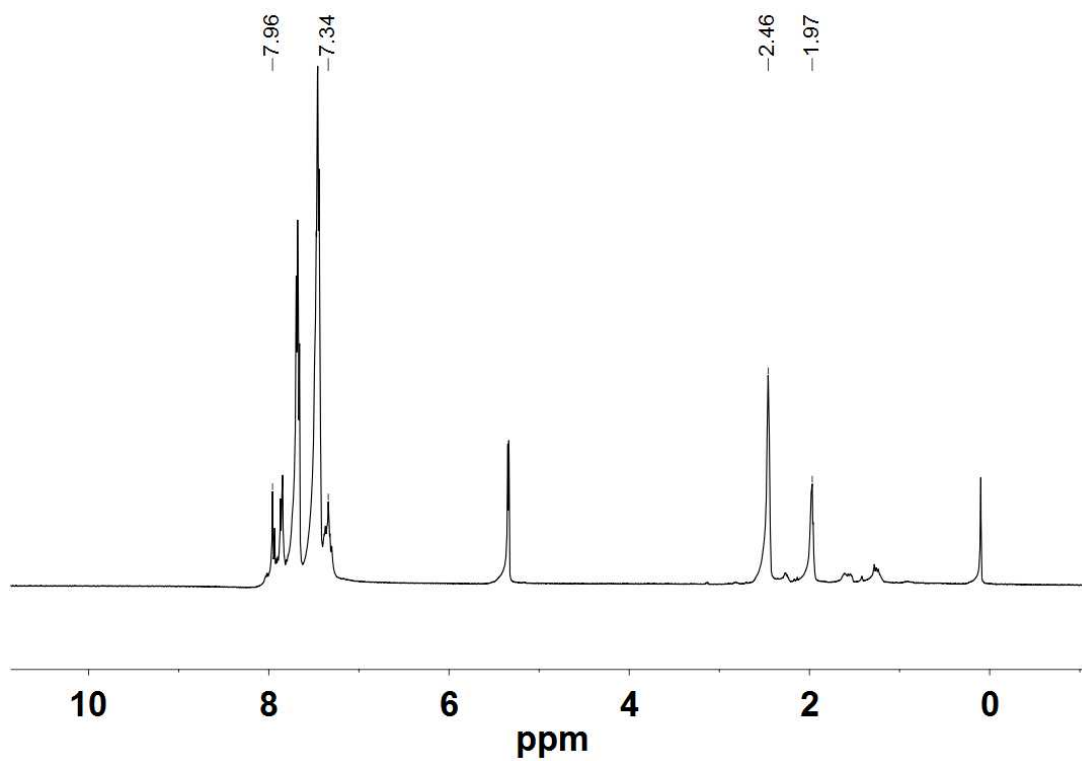

**Figure S7.**  $^1\text{H}$  NMR spectrum (500 MHz) of  $\text{Fe}(\text{pdt})(\text{CO})_2(\text{dppv})$  (**1c**) in  $\text{CD}_2\text{Cl}_2$  solution.



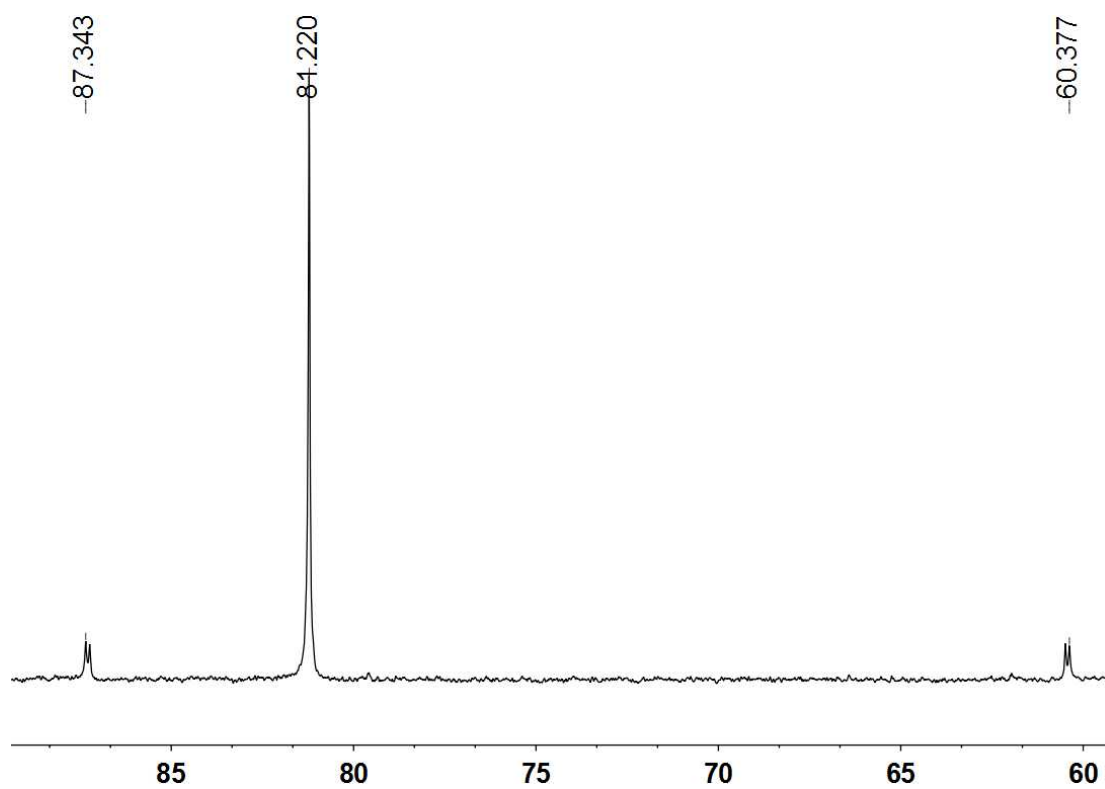

**Figure S8.**  $^{31}\text{P}$  NMR spectrum (202 MHz) of  $\text{Fe}(\text{pdt})(\text{CO})_2(\text{dppv})$  (**1c**) in  $\text{CD}_2\text{Cl}_2$  solution.

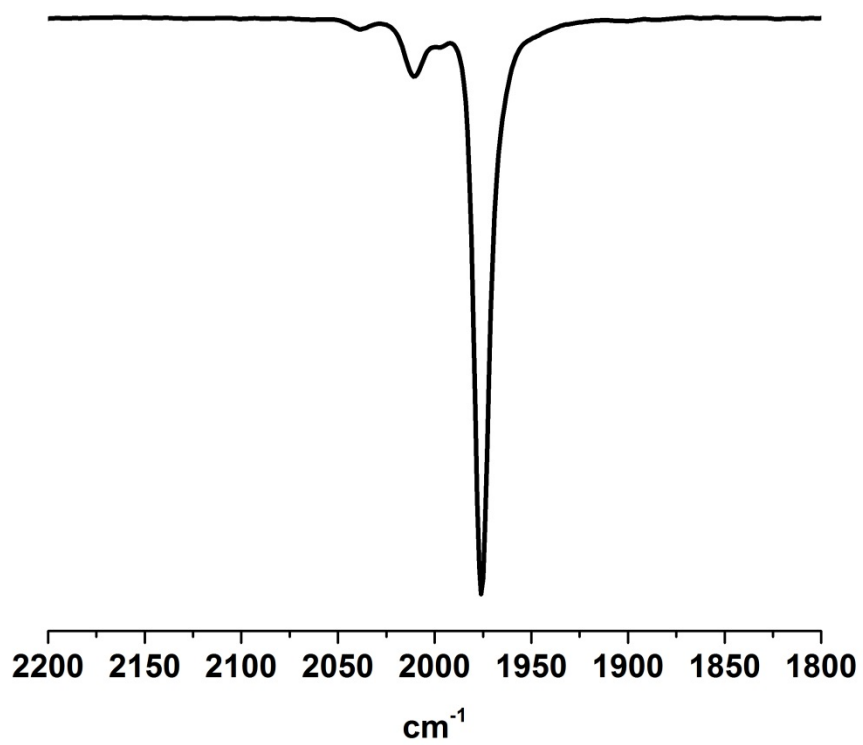

**Figure S9.** IR spectrum of  $\text{Fe}(\text{pdt})(\text{CO})_2(\text{dppv})$  (**1c**) in THF solution.

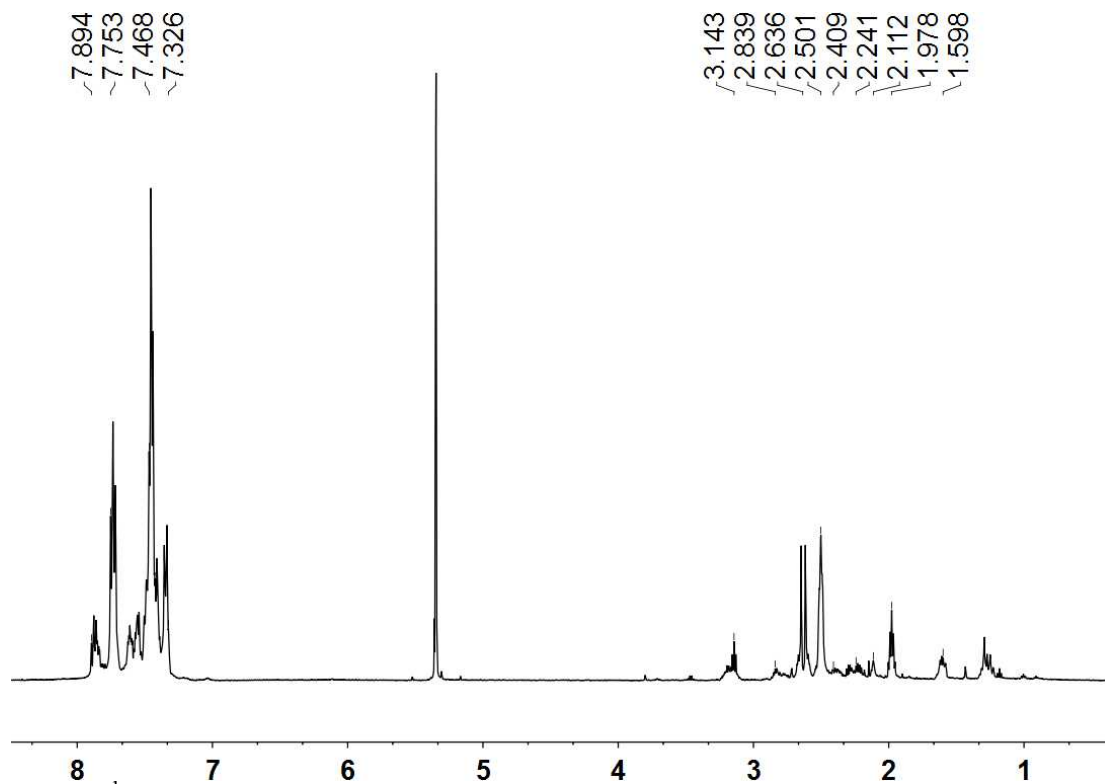

**Figure S10.**  $^1\text{H}$  NMR spectrum (500 MHz) of  $\text{Fe}(\text{pdt})(\text{CO})_2(\text{dppe})$  (**1d**) in  $\text{CD}_2\text{Cl}_2$  solution.

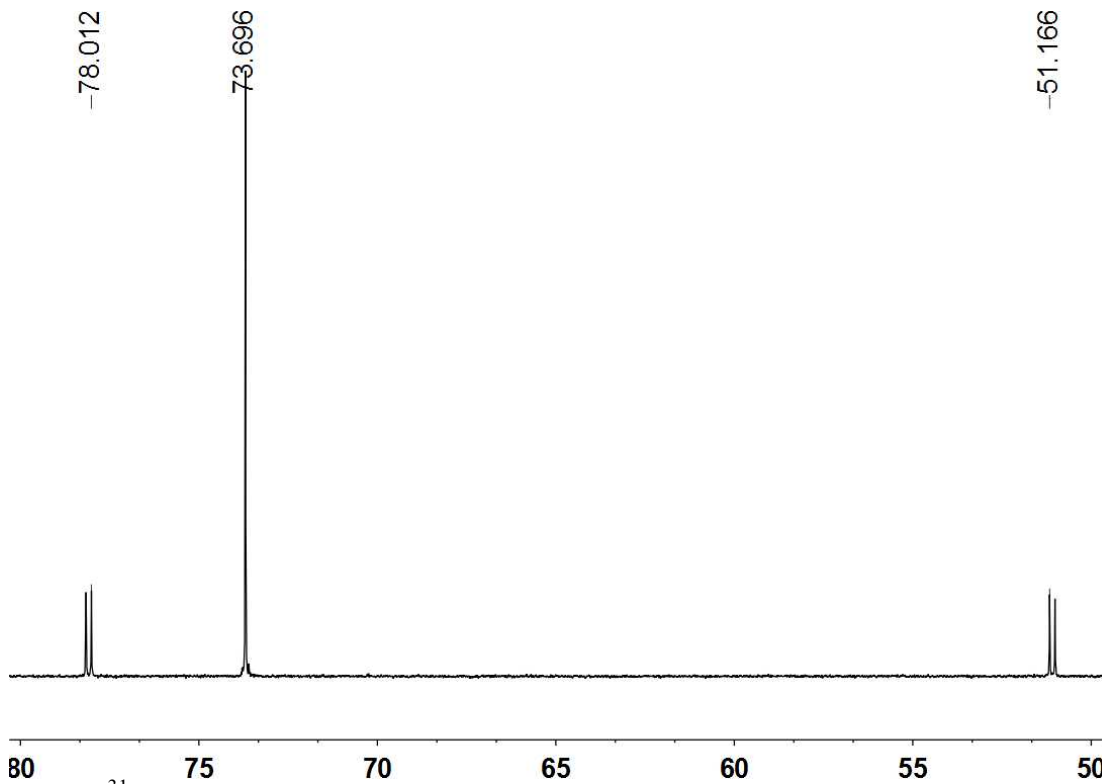

**Figure S11.**  $^{31}\text{P}$  NMR spectrum (202 MHz) of  $\text{Fe}(\text{pdt})(\text{CO})_2(\text{dppe})$  (**1d**) in  $\text{CD}_2\text{Cl}_2$  solution.

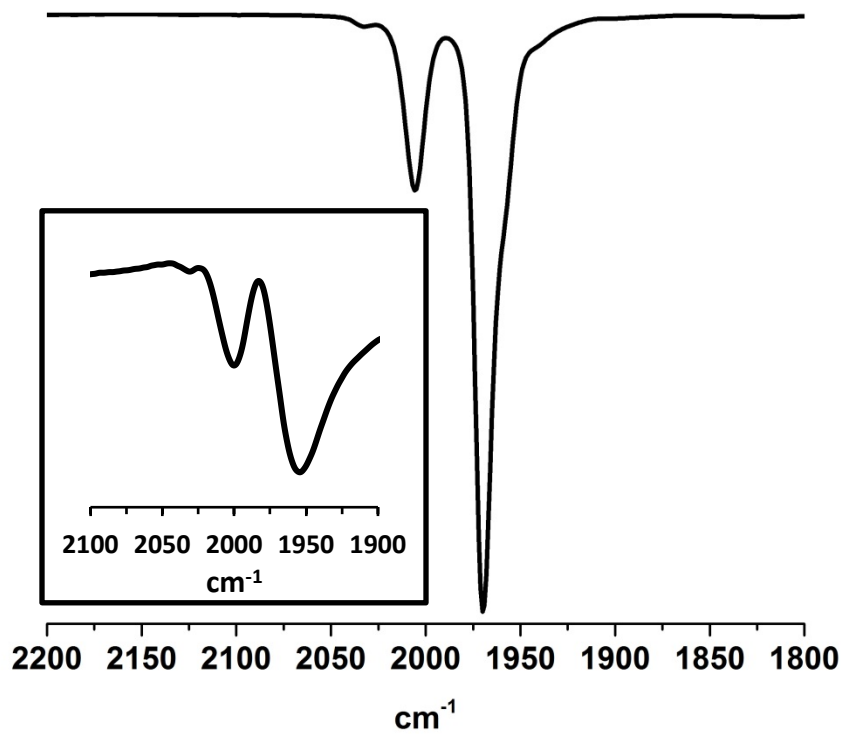

**Figure S12.** IR spectrum of  $\text{Fe}(\text{pdt})(\text{CO})_2(\text{dppe})$  (**1d**) in THF solution and as a solid (inset).

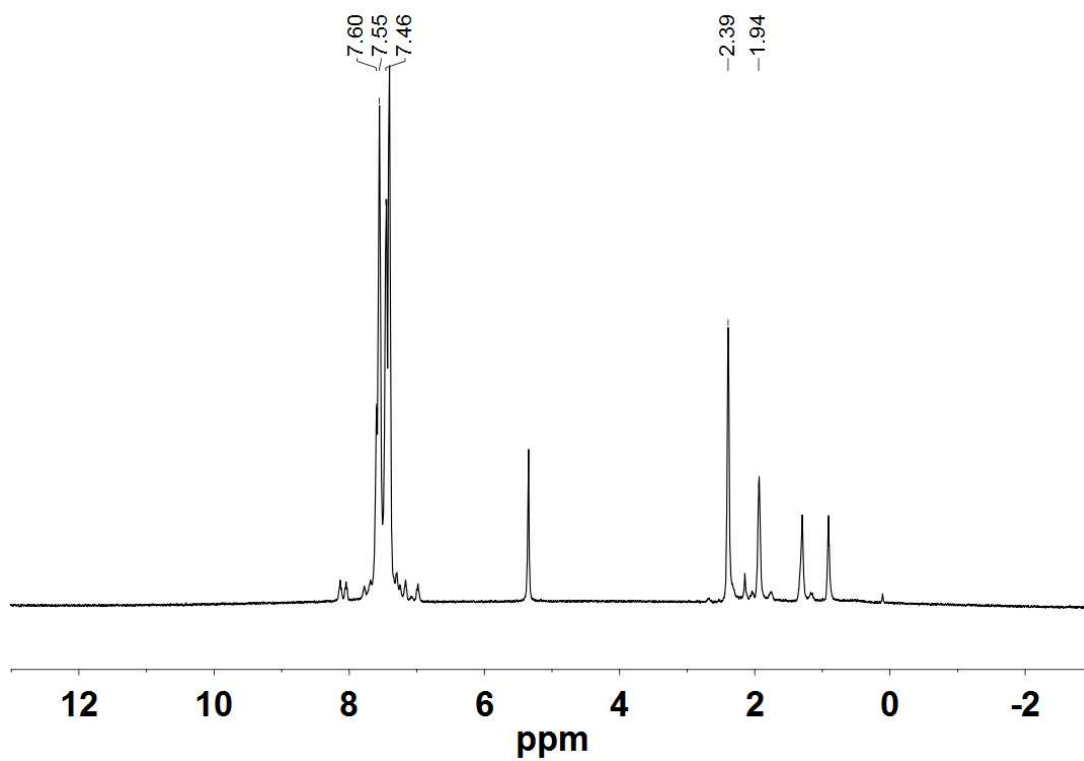

**Figure S13.**  $^1\text{H}$  NMR spectrum (500 MHz) of  $\text{Fe}(\text{pdt})(\text{CO})_2(\text{dppbz})$  (**1e**) in  $\text{CD}_2\text{Cl}_2$  solution.

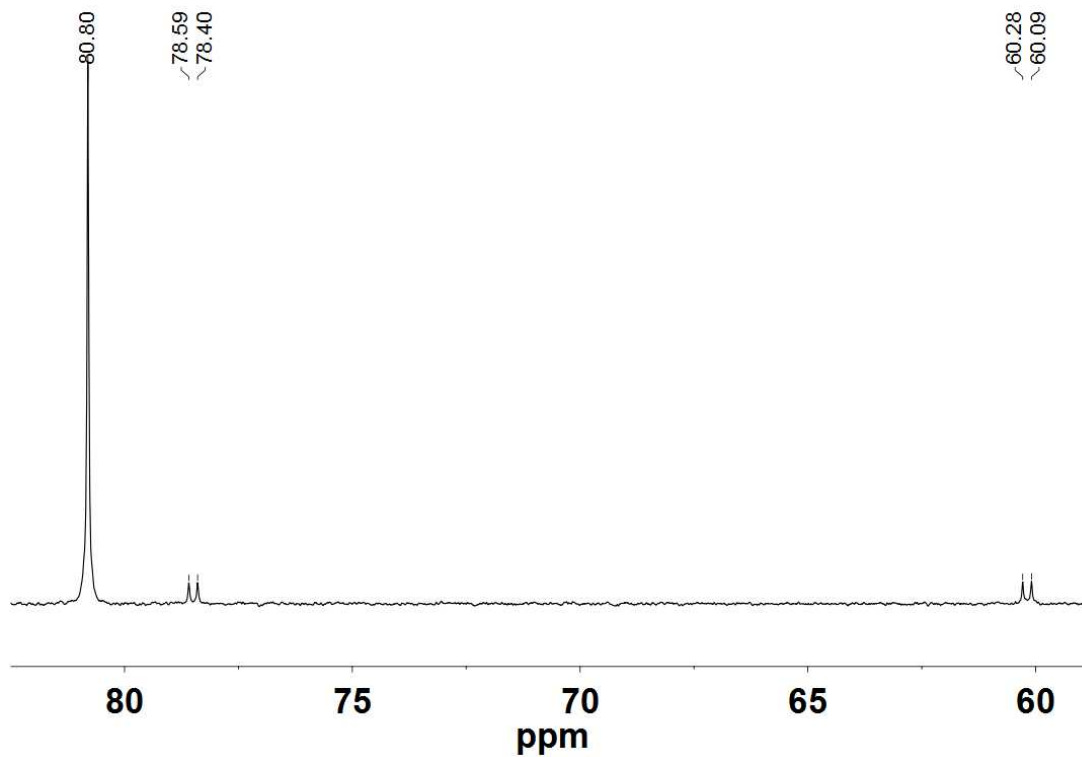

**Figure S14.**  $^{31}\text{P}$  NMR spectrum (202 MHz) of  $\text{Fe}(\text{pdt})(\text{CO})_2(\text{dppbz})$  (**1e**) in  $\text{CD}_2\text{Cl}_2$  solution.

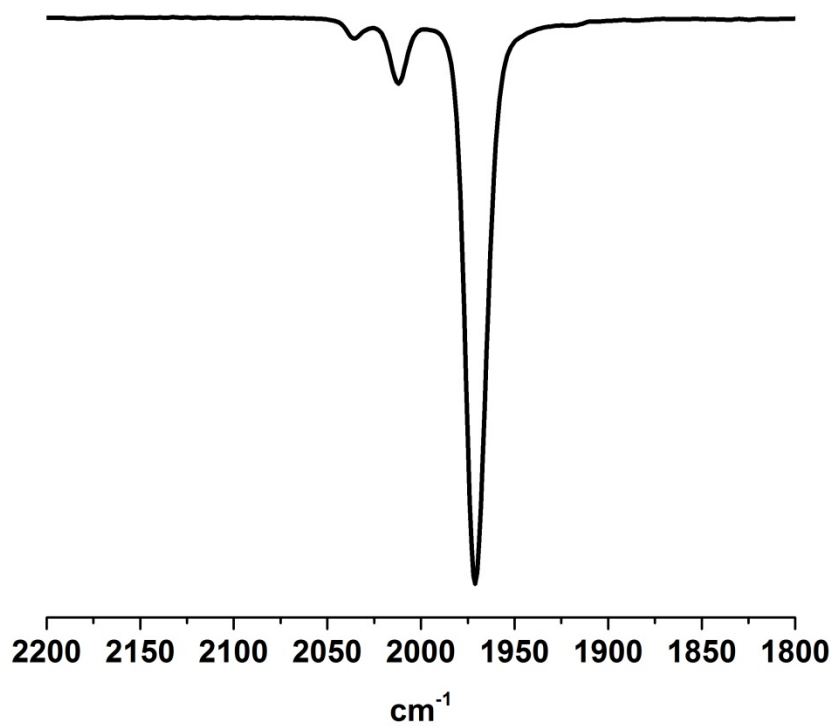

**Figure S15.** IR spectrum of  $\text{Fe}(\text{pdt})(\text{CO})_2(\text{dppbz})$  (**1e**) in THF solution.

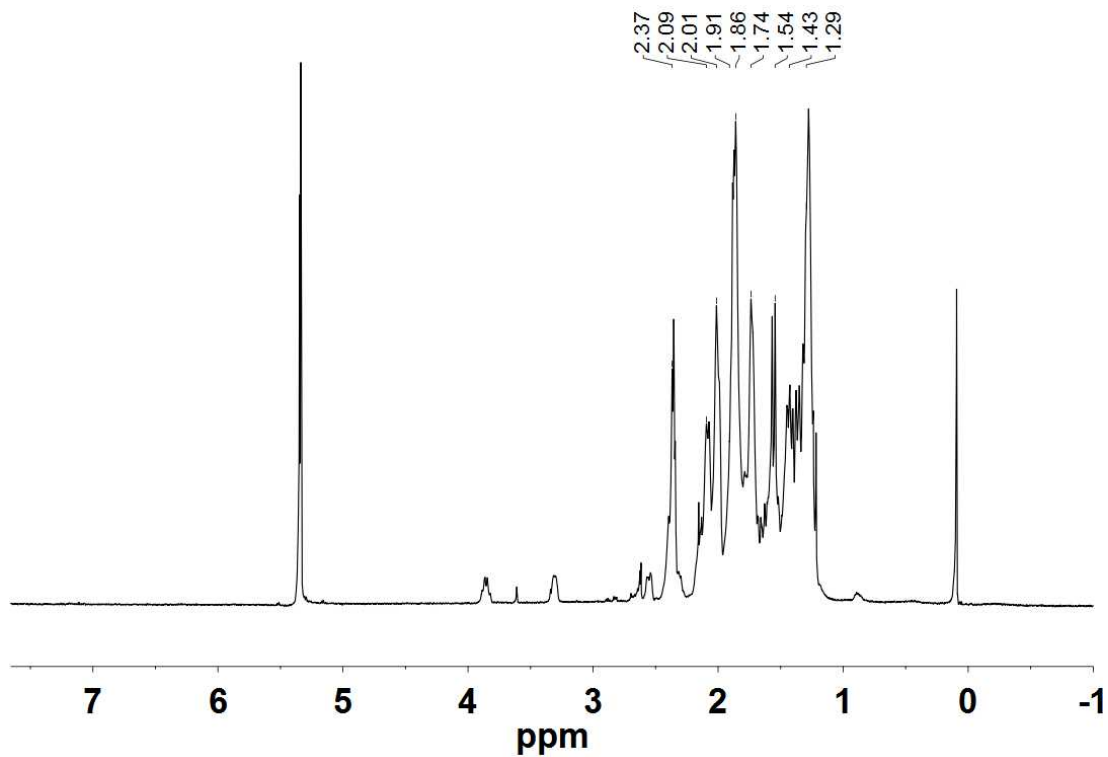

**Figure S16.**  $^1\text{H}$  NMR spectrum (500 MHz) of  $\text{Fe}(\text{pdt})(\text{CO})_2(\text{dcpe})$  (**1f**) in  $\text{CD}_2\text{Cl}_2$  solution.

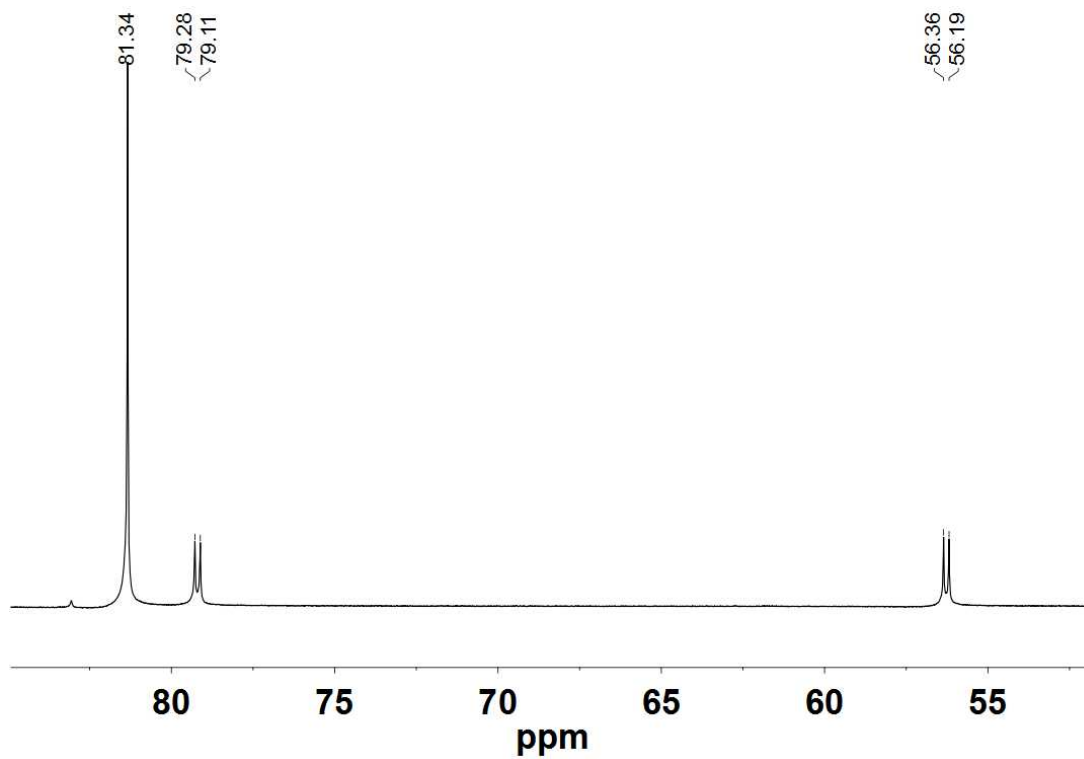

**Figure S17.**  $^{31}\text{P}$  NMR spectrum (202 MHz) of  $\text{Fe}(\text{pdt})(\text{CO})_2(\text{dcpe})$  (**1f**) in  $\text{CD}_2\text{Cl}_2$  solution.

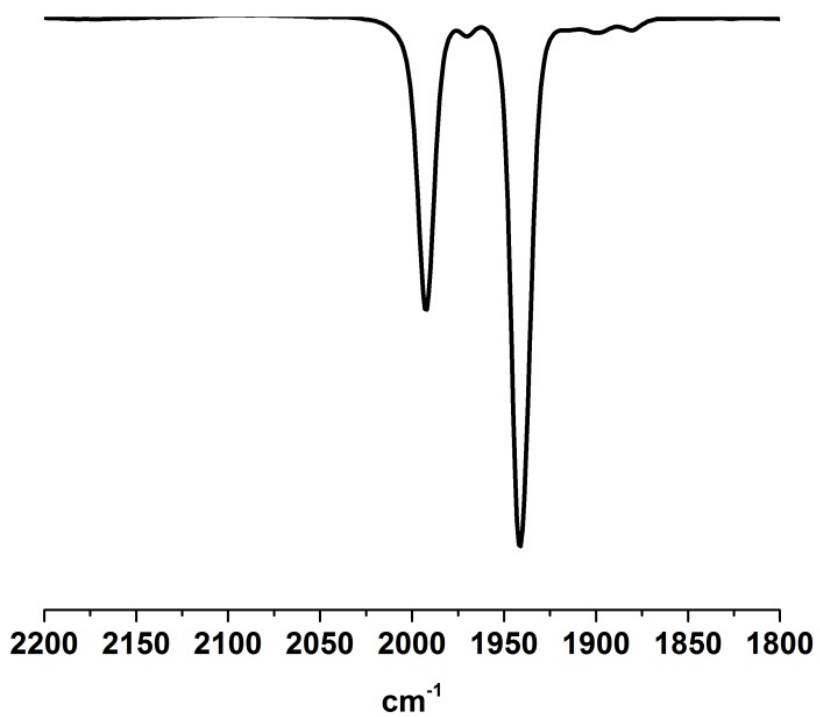

**Figure S18.** IR spectrum of Fe(pdt)(CO)<sub>2</sub>(dcpe) (**1f**) in THF solution.



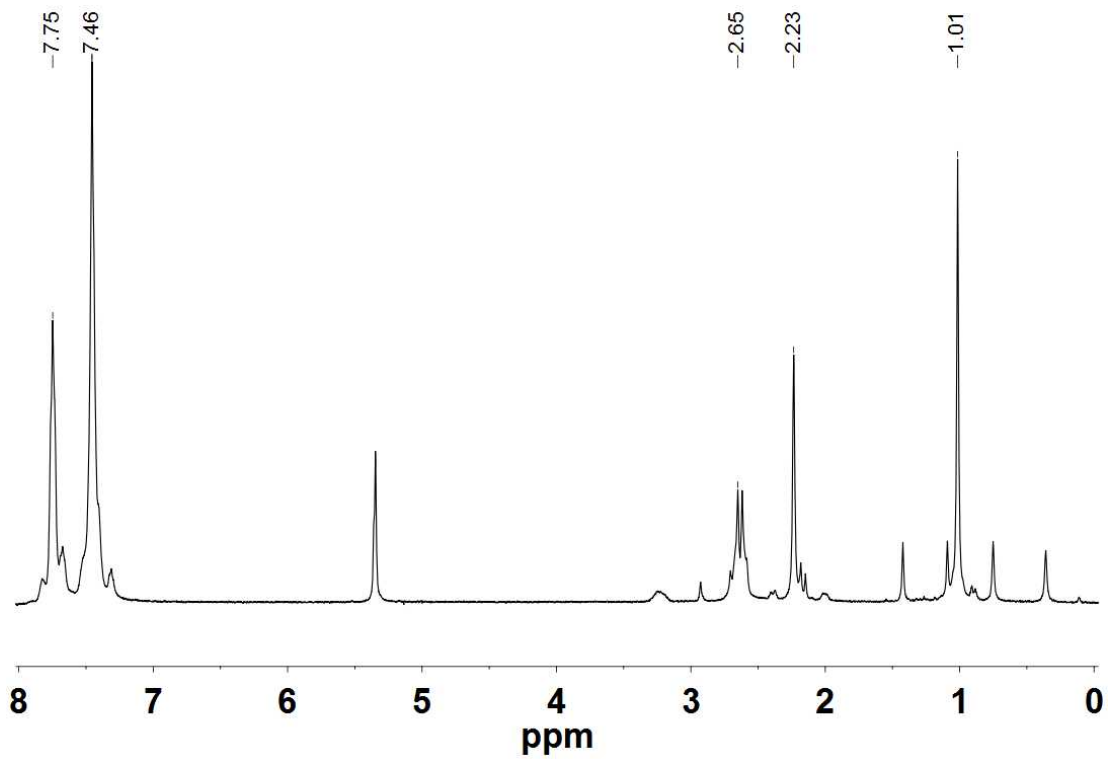

**Figure S19.**  $^1\text{H}$  NMR spectrum (500 MHz) of  $\text{Fe}(\text{Me}_2\text{pdt})(\text{CO})_2(\text{dppe})$  (**1g**) in  $\text{CD}_2\text{Cl}_2$  solution.

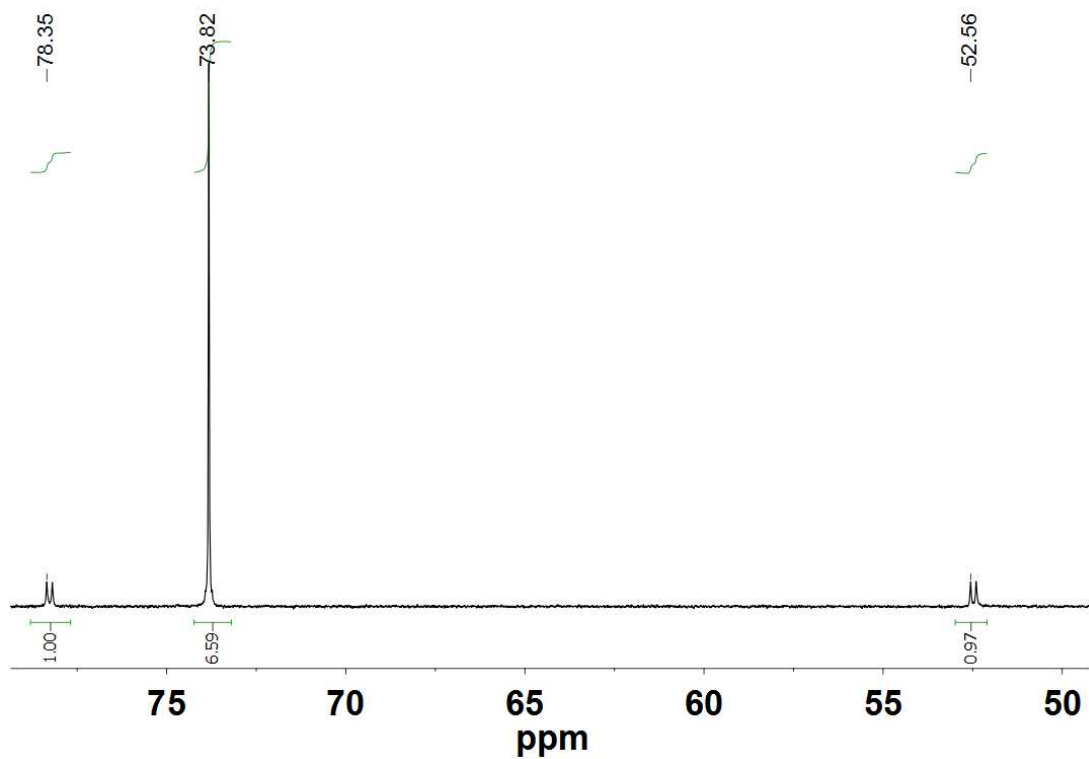

**Figure S20.**  $^{31}\text{P}$  NMR spectrum (202 MHz) of  $\text{Fe}(\text{Me}_2\text{pdt})(\text{CO})_2(\text{dppe})$  (**1g**) in  $\text{CD}_2\text{Cl}_2$  solution.

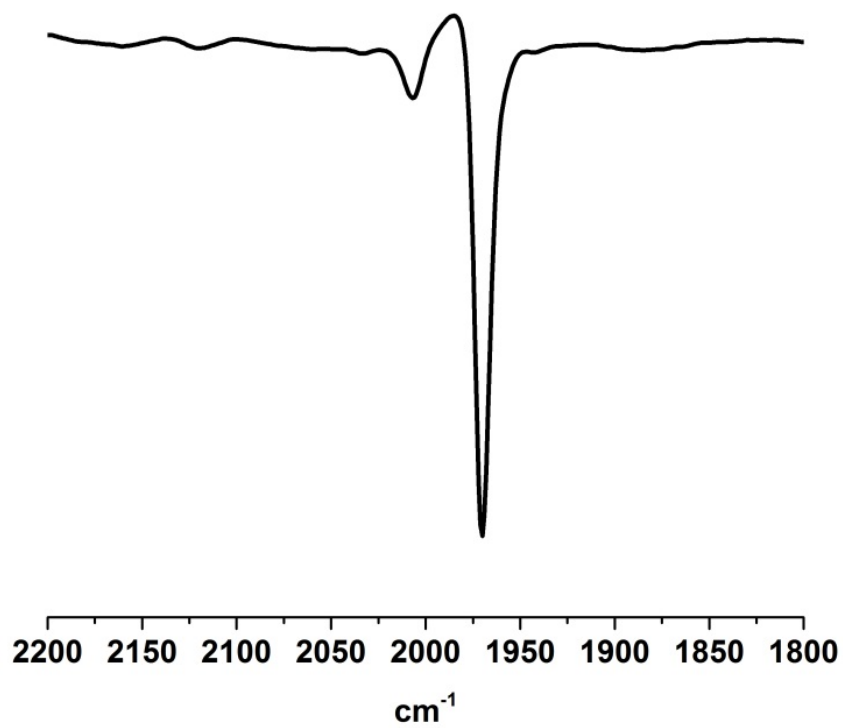

**Figure S21.** IR spectrum of Fe(Me<sub>2</sub>pdt)(CO)<sub>2</sub>(dppe) (**1g**) in THF solution.

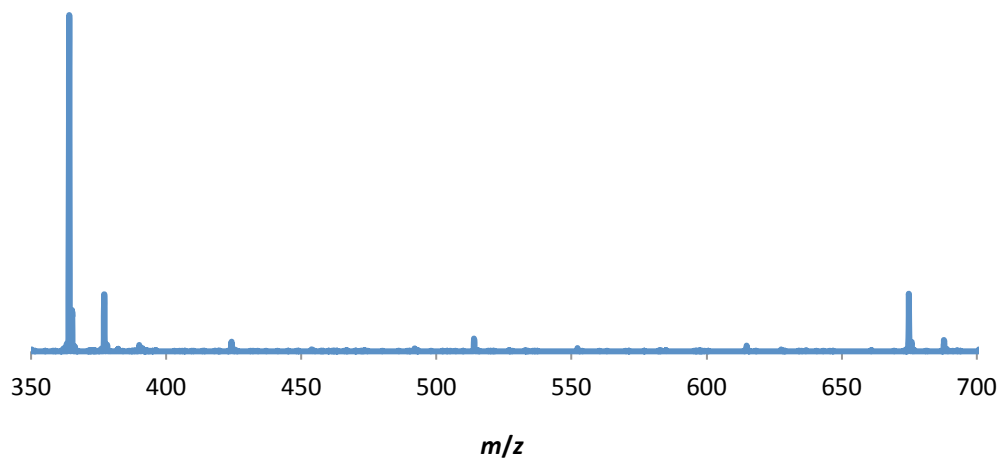

**Figure S22.** Positive ion ESI mass spectrum of <sup>57</sup>Fe<sub>2</sub>I<sub>4</sub>(<sup>i</sup>PrOH)<sub>4</sub>.

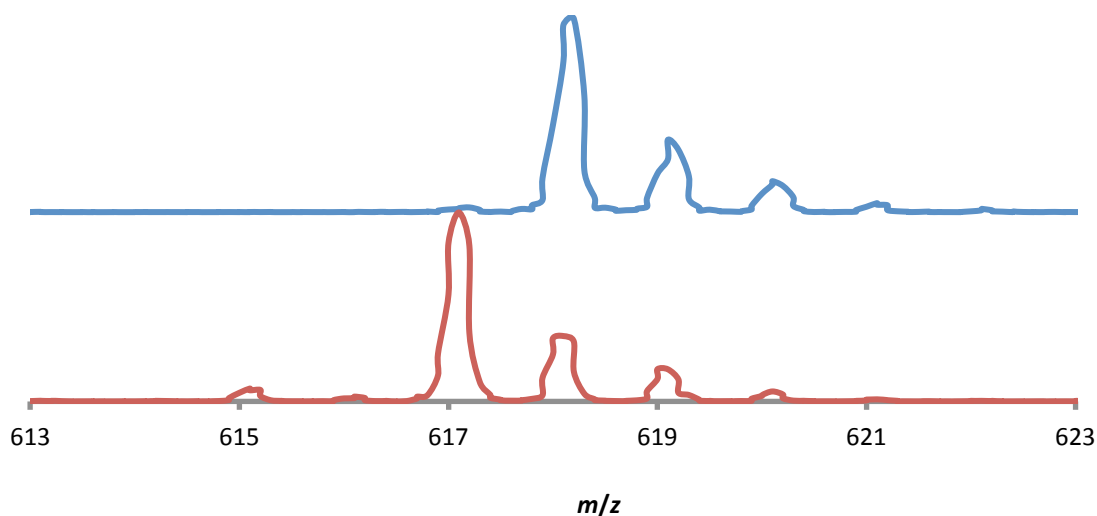

**Figure S23.** Positive ion ESI mass spectrum of *cis/trans*-[<sup>57</sup>Fe(pdt)(CO)<sub>2</sub>(dppe)] (<sup>57</sup>**1d**, top) and *cis/trans*-[Fe(pdt)(CO)<sub>2</sub>(dppe)] (**1d**, bottom) prepared using the same method.

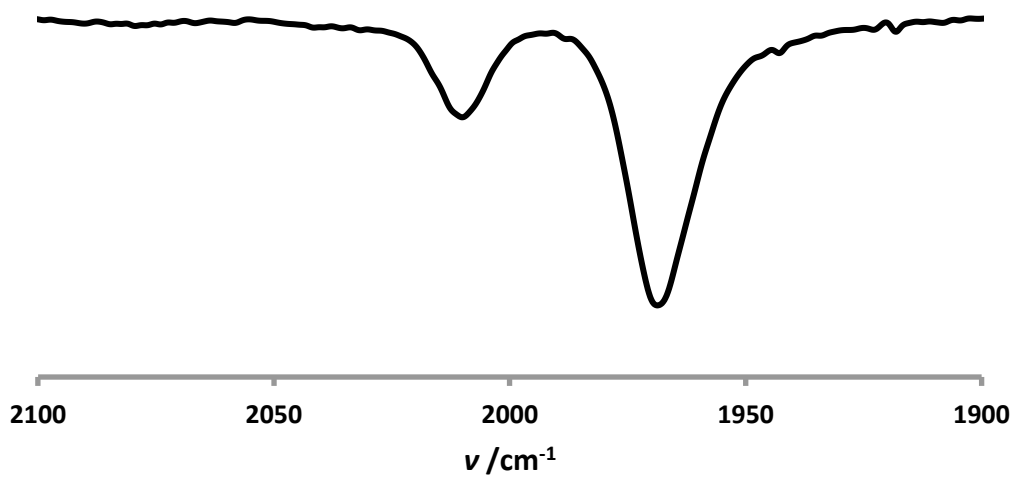

**Figure S24.** IR spectrum of *cis/trans*-[<sup>57</sup>Fe(pdt)(CO)<sub>2</sub>(dppe)] (<sup>57</sup>**1d**) in CH<sub>2</sub>Cl<sub>2</sub> solution.

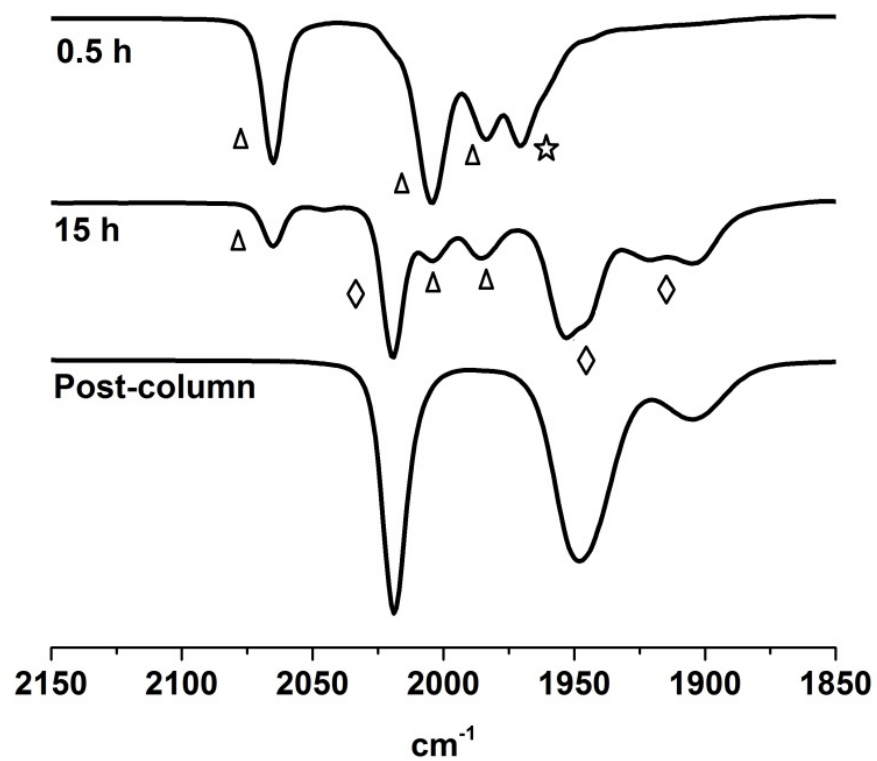

**Figure S25.** IR spectra of two stages in the reaction  $(bda)Fe(CO)_3$  (triangle) +  $Fe(pdt)(CO)_2(dppe)$  (**1d**) (star), and the purified  $Fe_2(pdt)(CO)_4(dppe)$  (**2d**) (diamond).

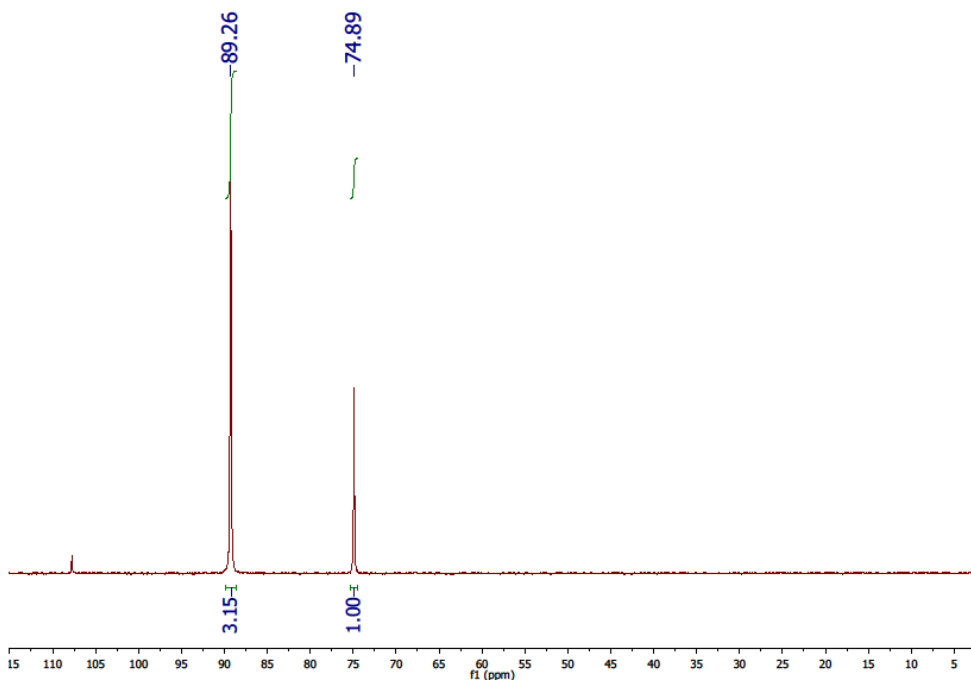

**Figure S26.** <sup>31</sup>P NMR spectrum of  $Fe_2(pdt)(dcpe)(CO)_4$  (**2f**) in  $CD_2Cl_2$ . Signal at 107 is impurity present as less than 2%.

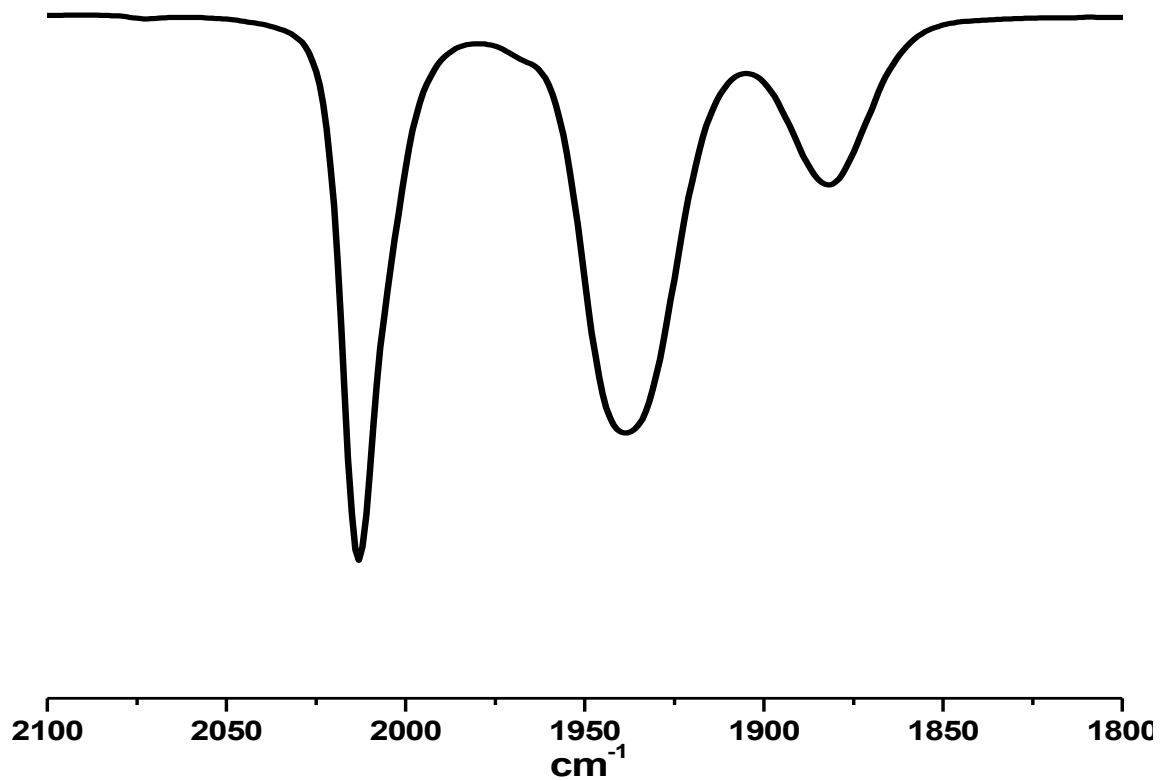

**Figure S27.** IR spectra of purified  $\text{Fe}_2(\text{pdt})(\text{CO})_4(\text{dcpe})$  (**2f**) in  $\text{CH}_2\text{Cl}_2$ .

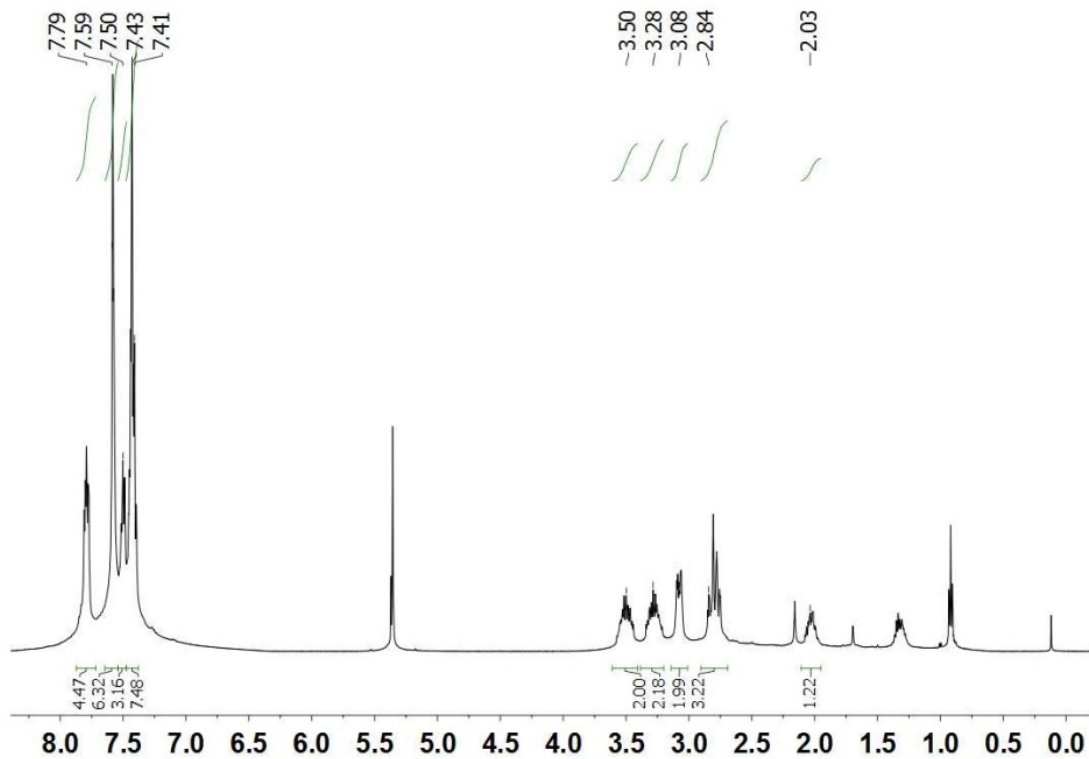

**Figure S28.**  $^1\text{H}$  NMR spectrum of  $[(\text{CO})_3\text{Mn}(\text{pdt})\text{Fe}(\text{CO})_2(\text{dppe})]\text{BF}_4$  ( $[\mathbf{3d}(\text{CO})]\text{BF}_4$ ) in  $\text{CD}_2\text{Cl}_2$ .

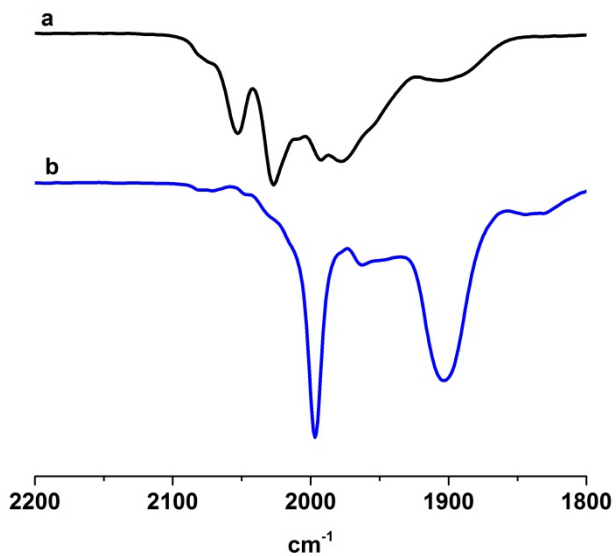

**Figure S29.** IR spectrum of (a)  $[(\text{CO})_3\text{Mn}(\text{pdt})\text{Fe}(\text{CO})_2(\text{dppe})]\text{BF}_4$  ( $[\mathbf{3d}(\text{CO})]\text{BF}_4$ ) at  $25^\circ\text{C}$  and (b)  $(\text{CO})_3\text{Mn}(\text{pdt})\text{Fe}(\text{CO})(\text{dppe})$  ( $\mathbf{3d}$ ) at  $-78^\circ\text{C}$  in  $\text{CH}_2\text{Cl}_2$ .

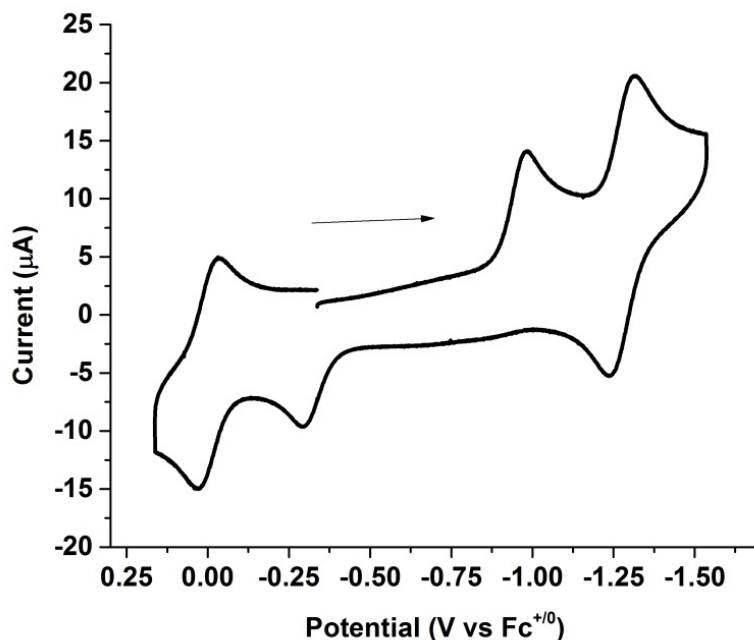

**Figure S30.** Cyclic voltammogram of 1.0 mM  $[(\text{CO})_3\text{Mn}(\text{pdt})\text{Fe}(\text{CO})_2(\text{dppe})]\text{BF}_4$  ( $[\mathbf{3d}(\text{CO})]\text{BF}_4$ ) in  $\text{CH}_2\text{Cl}_2$  at 25 °C. Conditions are described in the caption for Figure S42 but in this experiment, the scan rate was 1.0 V/s.

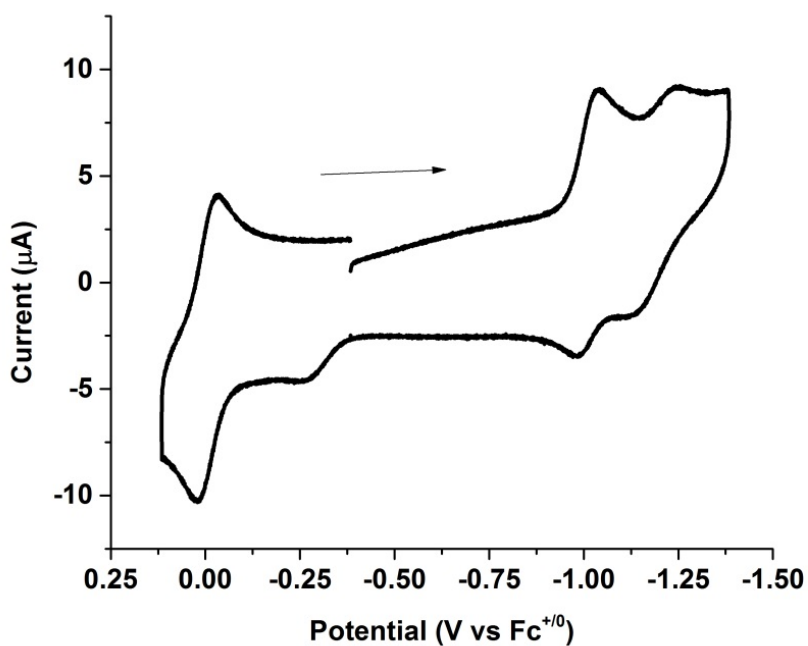

**Figure S31.** Cyclic voltammogram of 1.0 mM  $[(\text{CO})_3\text{Mn}(\text{pdt})\text{Fe}(\text{CO})_2(\text{dppe})]\text{BF}_4$  ( $[\mathbf{3d}(\text{CO})]\text{BF}_4$ ) in  $\text{CH}_2\text{Cl}_2$  at -78 °C. Conditions are described in the caption for Figure S42.

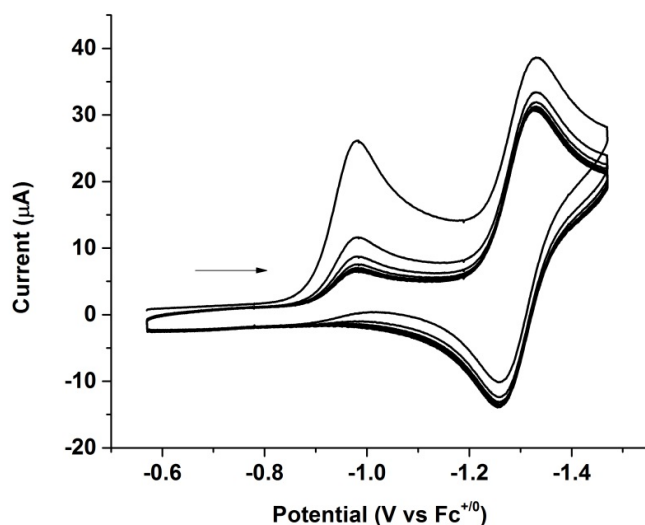

**Figure S32.** Cyclic voltammogram of  $[(\text{CO})_3\text{Mn}(\text{pdt})\text{Fe}(\text{CO})_2(\text{dppe})]\text{BF}_4$  in  $\text{CH}_2\text{Cl}_2$ , scanning 20 segments without disturbing the solution or polishing the working electrode. Conditions are described in the caption for Figure S42 but in this experiment, the scan rate was 1.0 V/s.

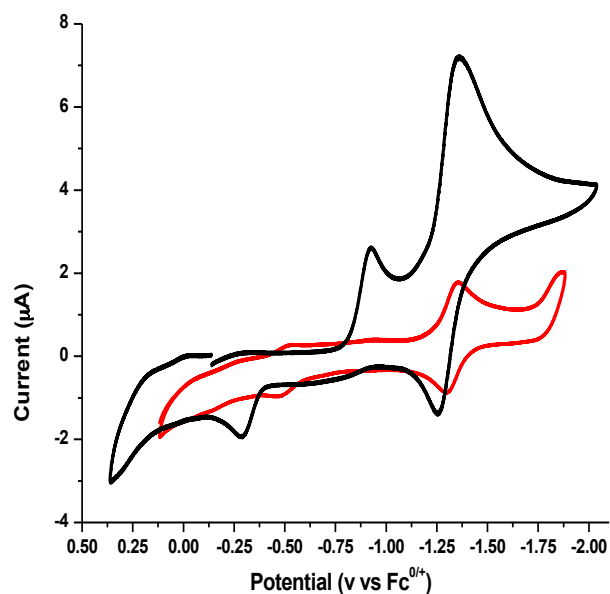

**Figure S33.** Black trace: Cyclic voltammogram of 1.0 mM  $[(\text{CO})_3\text{Mn}(\text{pdt})\text{Fe}(\text{CO})_2(\text{dppe})]\text{BF}_4$  ( $[\mathbf{3d}(\text{CO})]\text{BF}_4$ ) in THF at 25 °C. Red Trace: Cyclic voltammogram of 1.0 mM  $(\text{CO})_3\text{Mn}(\text{pdt})\text{Fe}(\text{CO})(\text{dppe})$  under identical conditions. Conditions: see Figure S42.



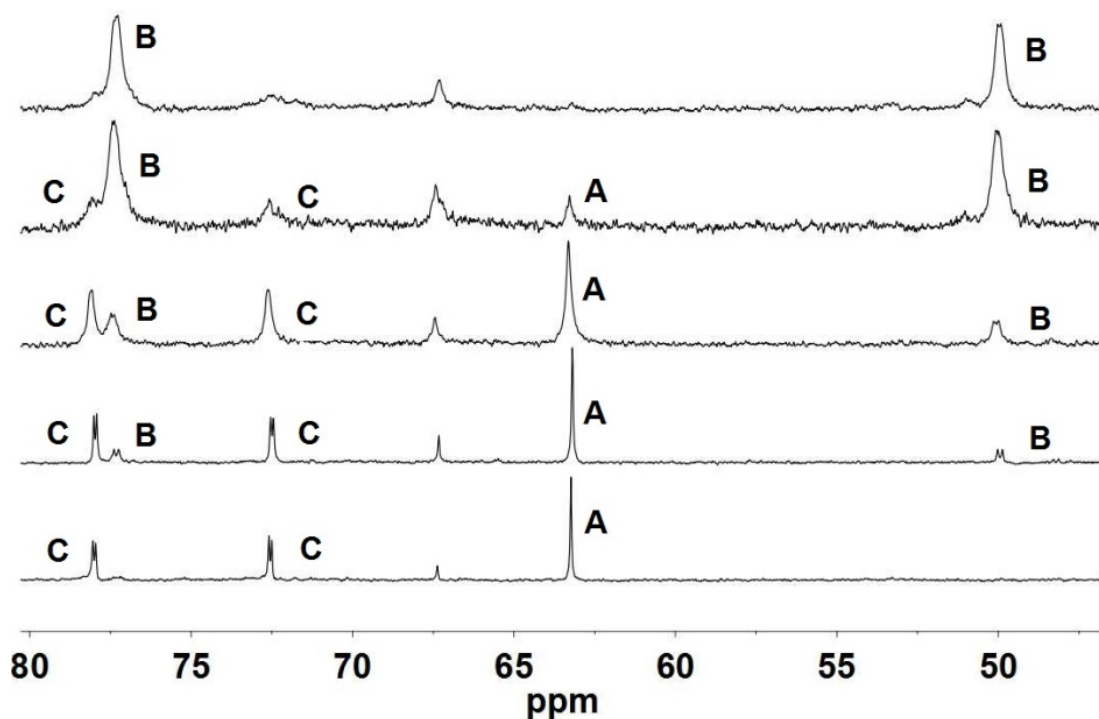

**Figure S34.**  $^{31}\text{P}$  NMR spectra for stages in the reaction of a 1:1 mixture of  $[(\text{acenaphthene})\text{Mn}(\text{CO})_3]\text{BF}_4$  with  $\text{Fe}(\text{edt})(\text{CO})_2(\text{dppe})$  (**1b**) in  $\text{CD}_2\text{Cl}_2$  solution at  $20^\circ\text{C}$ . From top to bottom reaction time = 15 min, 3.5 h, 30 h, 48 h, 3 weeks). Proposed reaction pathway and isomer assignments are shown below.

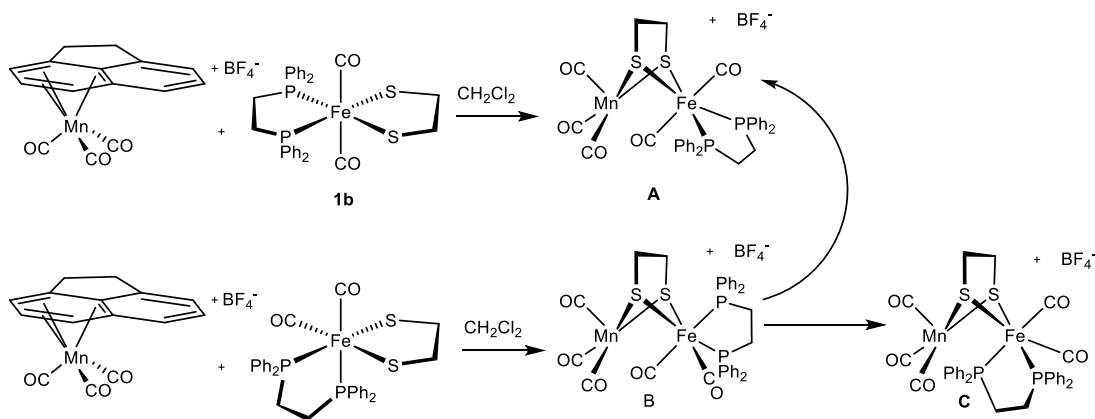

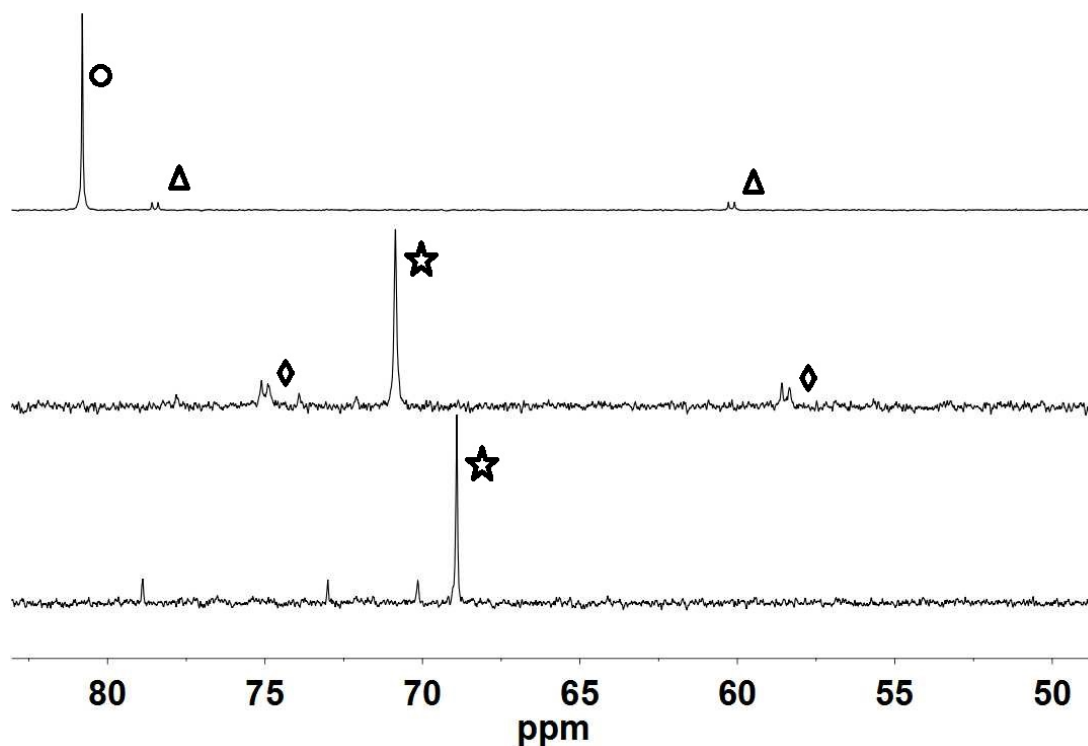

**Figure S35.**  $^{31}\text{P}$  NMR spectra related to the reaction of  $\text{Fe}(\text{pdt})(\text{CO})_2(\text{dppbz})$  (**1e**) and  $[(\text{acenaphthene})\text{Mn}(\text{CO})_3]\text{BF}_4$  to give  $[(\text{CO})_4\text{Mn}(\text{pdt})\text{Fe}(\text{CO})(\text{dppbz})]\text{BF}_4$  ( $\text{CD}_2\text{Cl}_2$  solutions):

*Top:* *unsym-1e* (triangle) and *sym-1e* (circle).

*Middle:* **1e** +  $[(\text{acenaphthene})\text{Mn}(\text{CO})_3]\text{BF}_4$  after 3 h (diamond = *unsym-[(CO)<sub>4</sub>Mn(pdt)Fe(CO)(dppbz)]<sup>+</sup>*, star = *sym-[(CO)<sub>4</sub>Mn(pdt)Fe(CO)(dppbz)]<sup>+</sup>*)

*Bottom:* Same mixture was allowed to stand 12 h, evaporated and recrystallized from  $\text{CH}_2\text{Cl}_2/\text{hexanes}$  (signals at  $\delta$  73.1 and 70.2 are unknown impurities).

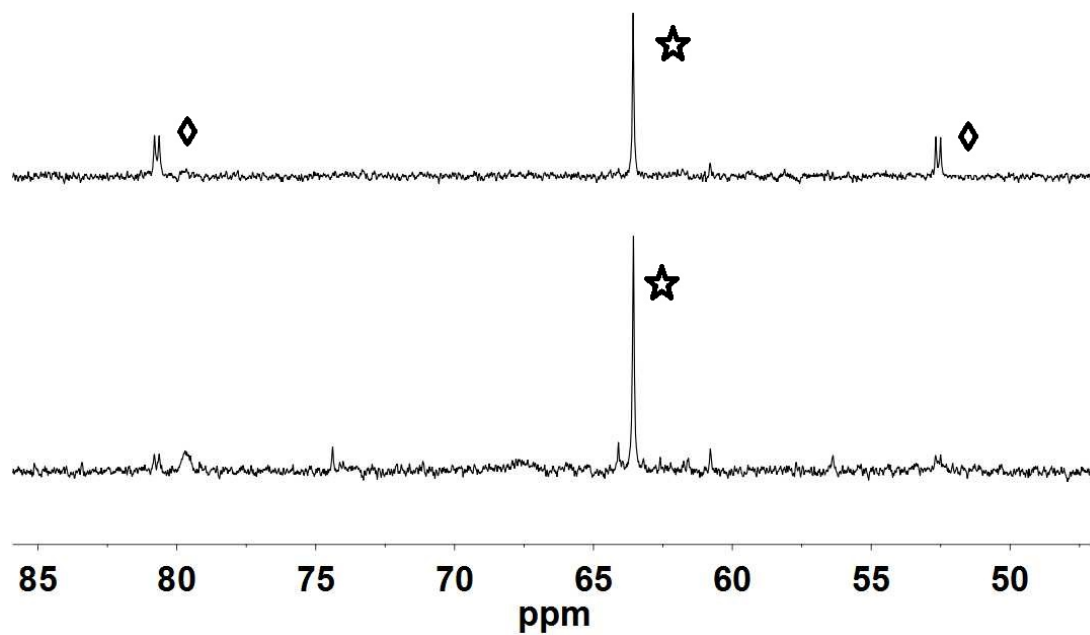

**Figure S36.**  $^{31}\text{P}$  NMR spectra related to the reaction of  $\text{Fe}(\text{pdt})(\text{CO})_2(\text{dcpe})$  (**1f**) and  $[(\text{acenaphthene})\text{Mn}(\text{CO})_3]\text{BF}_4$  to give  $[(\text{CO})_4\text{Mn}(\text{pdt})\text{Fe}(\text{CO})(\text{dcpe})]\text{BF}_4$  ( $\text{CD}_2\text{Cl}_2$  solutions):  
*Top: unsym-1f* (diamonds) and *sym-1f* (stars).  
*Bottom: 1f + [(acenaphthene)Mn(CO)<sub>3</sub>]BF<sub>4</sub> after 16 h.*

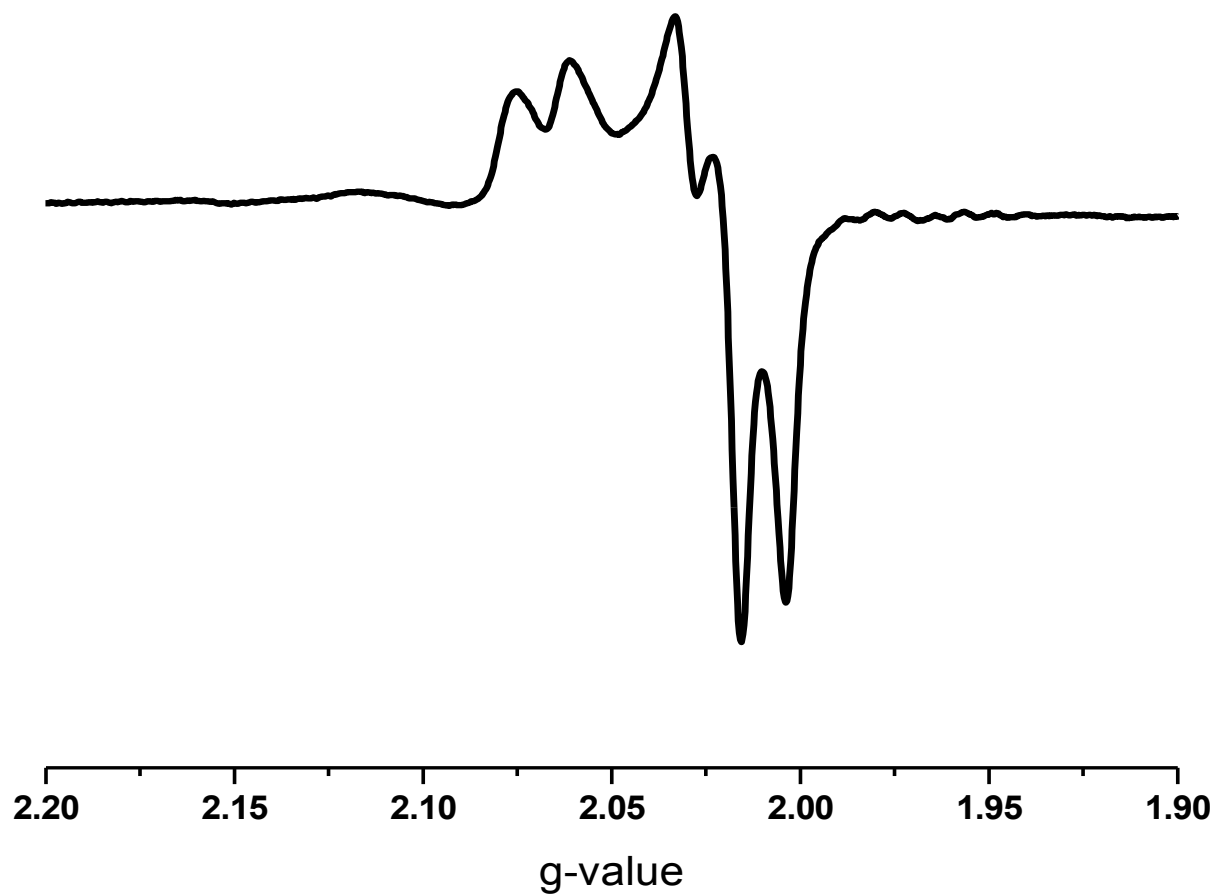

**Figure S37.** X-band EPR spectra of a mixture of  $[(\text{CO})_3\text{Mn}(\text{pdt})\text{Fe}(\text{CO})_2(\text{dppe})]\text{BF}_4$  ( $[\mathbf{3d}(\text{CO})]\text{BF}_4$ ) and  $\text{Cp}_2\text{Co}$  in 4:1 mixture of THF and toluene frozen at 77 K.

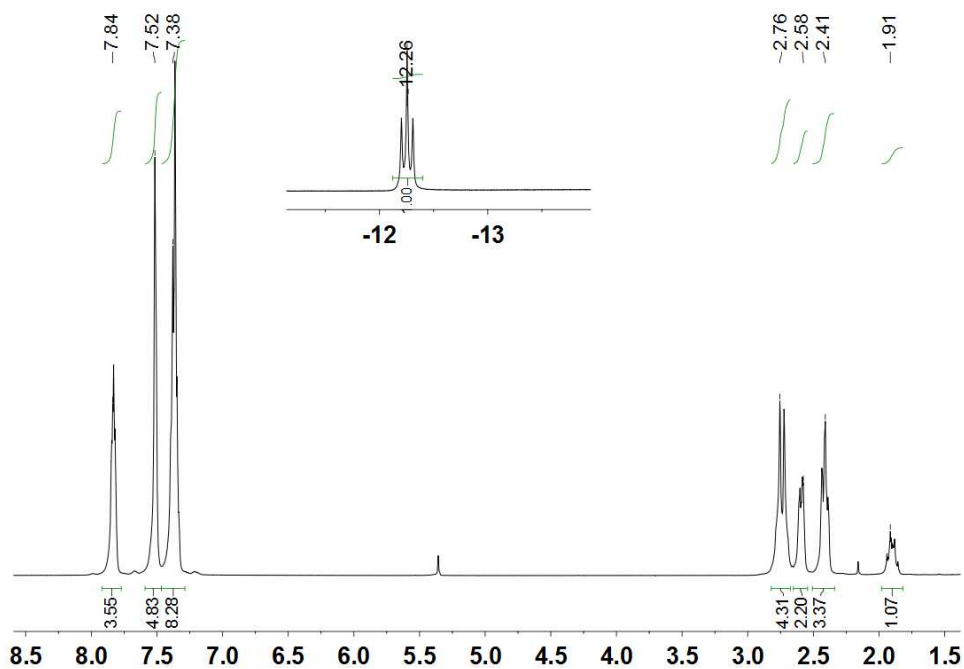

**Figure S38.**  $^1\text{H}$  NMR spectrum of  $(\text{CO})_3\text{Mn}(\text{pdt})(\mu\text{-H})\text{Fe}(\text{CO})(\text{dppe})$  (**H3d**) in  $\text{CD}_2\text{Cl}_2$  solution (*Inset*: High field region of spectrum, showing signal for the hydride ligand).

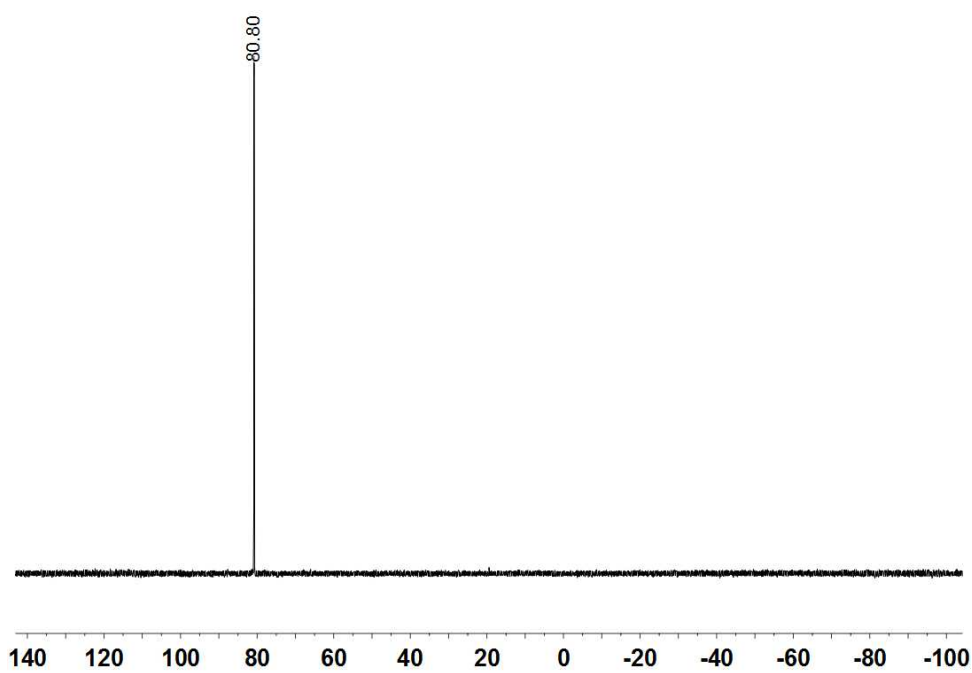

**Figure S39.**  $^{31}\text{P}$  NMR spectrum of  $(\text{CO})_3\text{Mn}(\text{pdt})(\mu\text{-H})\text{Fe}(\text{CO})(\text{dppe})$  (**H3d**) in  $\text{CD}_2\text{Cl}_2$  solution.

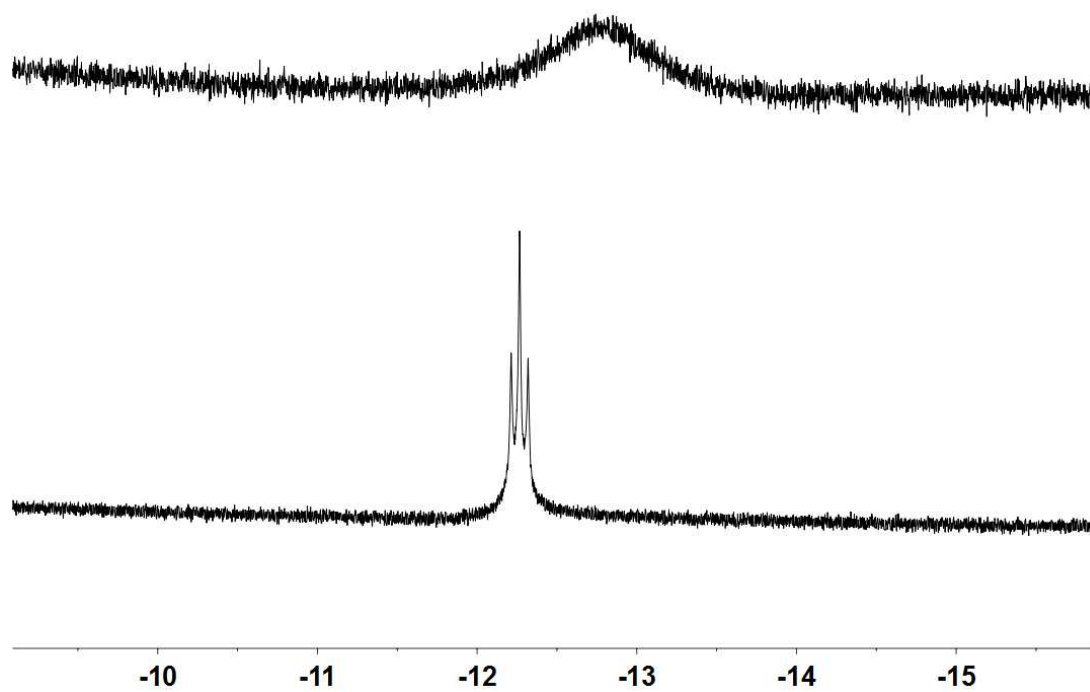

**Figure S40.** High field region of the <sup>1</sup>H NMR spectra of H3d (bottom) and a 1:1 mixture of H3 and [H(Et<sub>2</sub>O)<sub>2</sub>]BAR<sup>F</sup><sub>24</sub> (top) in CH<sub>2</sub>Cl<sub>2</sub> solution.

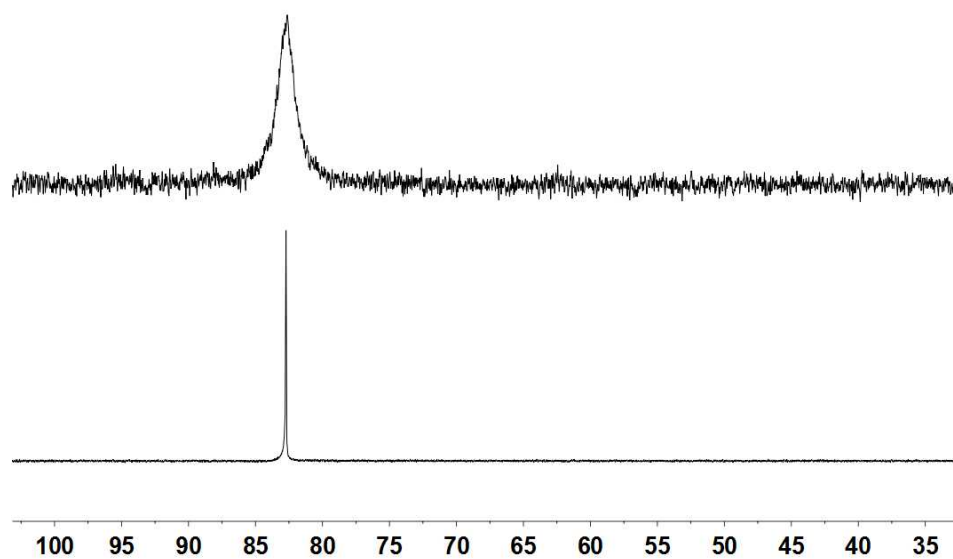

**Figure S41.**  $^{31}\text{P}$  NMR spectra of H3d (bottom) and of a 1:1 mixture of H3d and  $[\text{H}(\text{Et}_2\text{O})_2]\text{BAr}^{\text{F}}_{24}$  (top) in  $\text{CH}_2\text{Cl}_2$  solution.

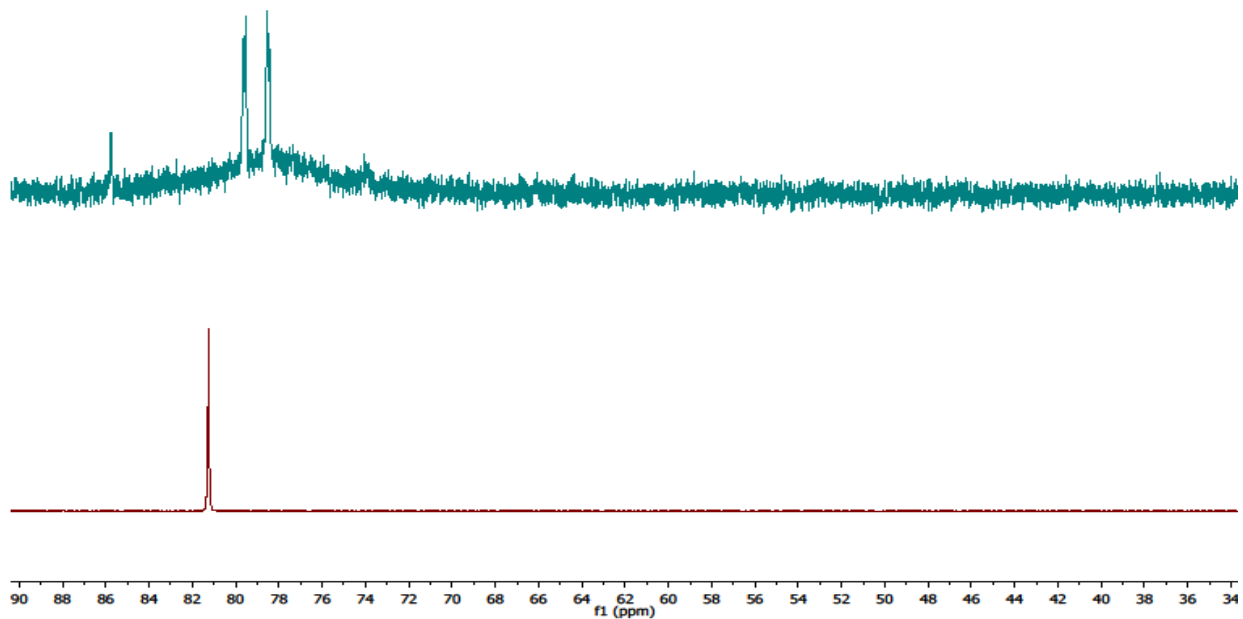

**Figure S42.**  $^{31}\text{P}$  NMR spectra of **H3** (bottom) and of a 1:2 mixture of **H3d** and  $[\text{H}(\text{Et}_2\text{O})_2]\text{BAr}^{\text{F}}_{24}$  (top). For the top spectrum,  $J_{\text{P-P}}$  is 21.5 Hz. The signal at  $\delta 86$  is an unidentified impurity. *Note:* When the protonation was conducted under an atmosphere of CO, however, the IR spectrum of the reaction mixture did not indicate formation of  $[\mathbf{3}(\text{CO})]^+$ .



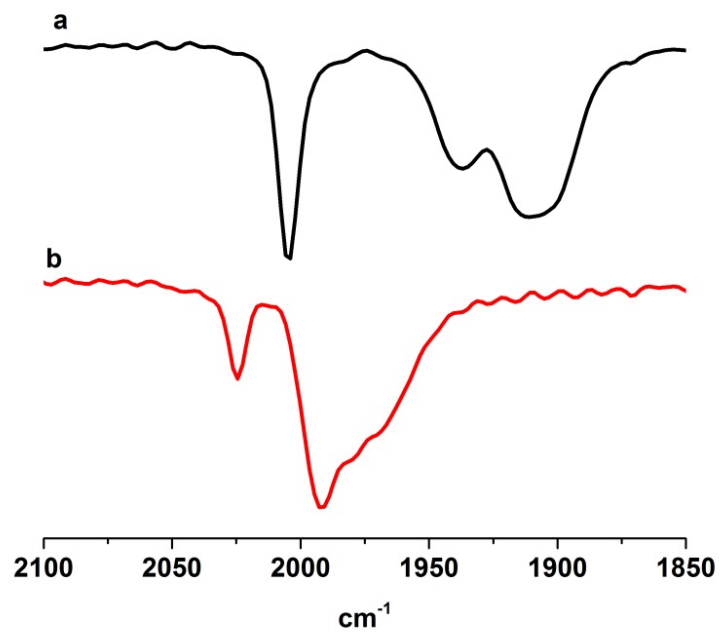

**Figure S43.** IR spectra of CH<sub>2</sub>Cl<sub>2</sub> solutions of (a) (CO)<sub>3</sub>Mn(pdt)( $\mu$ -H)Fe(CO)(dppe) (H3d) before and after treatment with FcBF<sub>4</sub>.

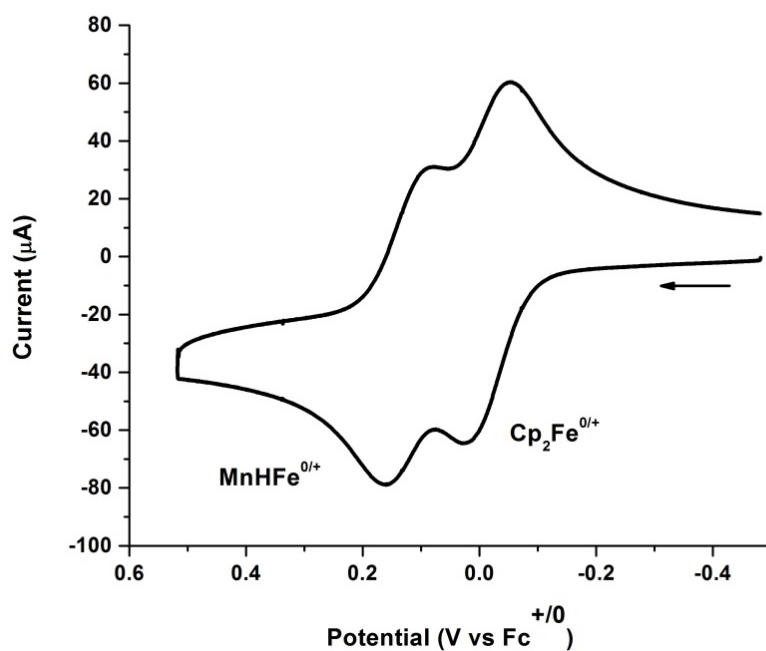

**Figure S44.** Cyclic voltammogram of  $(\text{CO})_3\text{Mn}(\text{pdt})(\mu\text{-H})\text{Fe}(\text{CO})(\text{dppe})$  (**H3d**) in  $\text{CH}_2\text{Cl}_2$  solution. *Conditions:*

1.0 mM  $(\text{CO})_3\text{Mn}(\text{pdt})(\mu\text{-H})\text{Fe}(\text{CO})(\text{dppe})$

0.1 M  $[\text{Bu}_4\text{N}]\text{PF}_6$

working electrode: glassy carbon

counter electrode: Pt

pseudoreference electrode: Ag

scan rate = 0.5 V/s

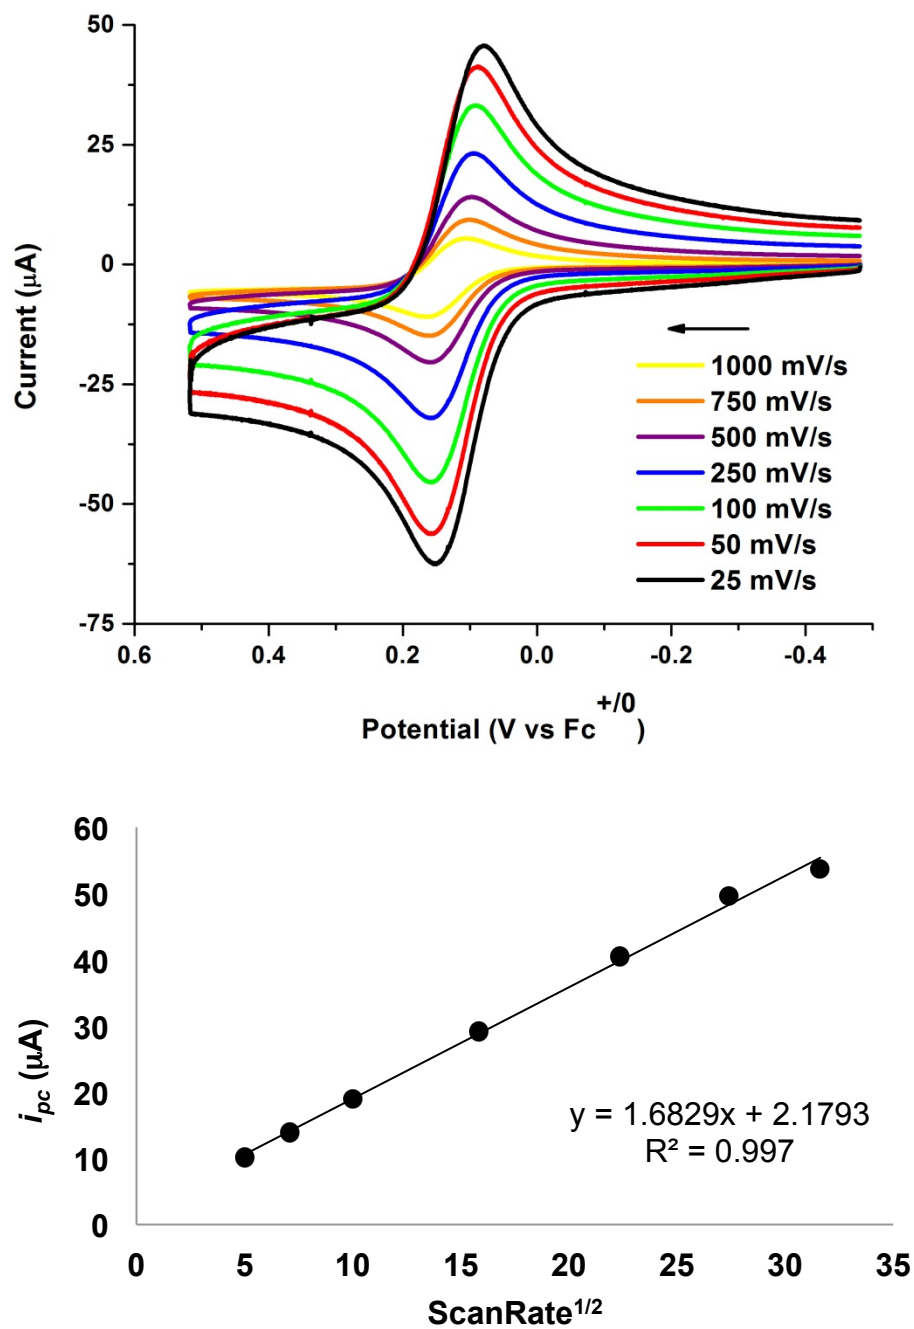

**Figure S45.** Cyclic voltammograms of  $(\text{CO})_3\text{Mn}(\text{pdt})(\mu\text{-H})\text{Fe}(\text{CO})(\text{dppe})$  (**H3d**) at various scan rates (top) and plot of  $i_{pc}/(\text{scan rate})^{1/2}$  (bottom).  
*Conditions:* See Figure S42.

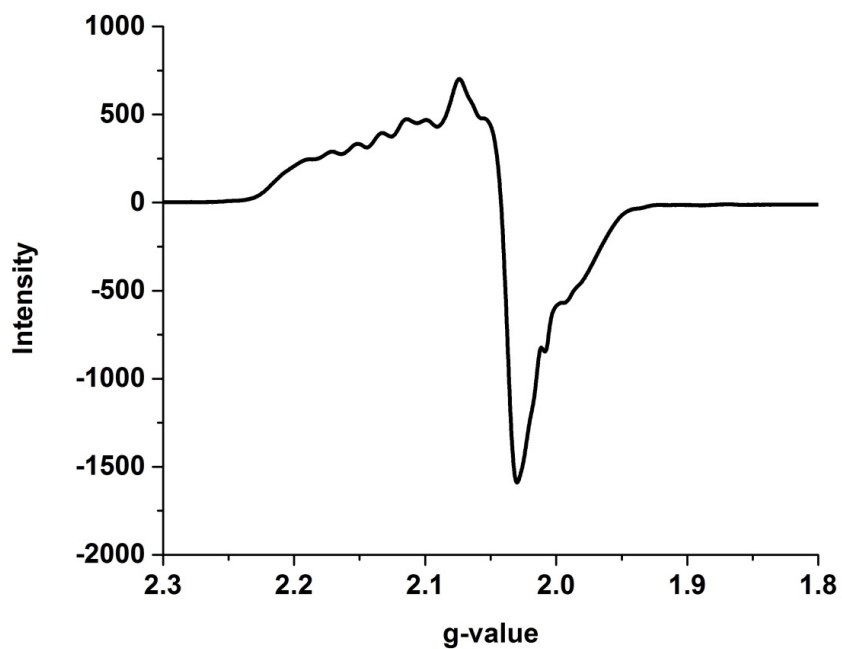

**Figure S46.** X-band EPR spectrum of a frozen (110 K) mixture of  $(\text{CO})_3\text{Mn}(\text{pdt})(\mu\text{-H})\text{Fe}(\text{CO})(\text{dppe})$  (H3) and  $[\text{acetylFc}]\text{BAr}^{\text{F}}_{24}$  in 3:1 toluene: $\text{CH}_2\text{Cl}_2$  solution.

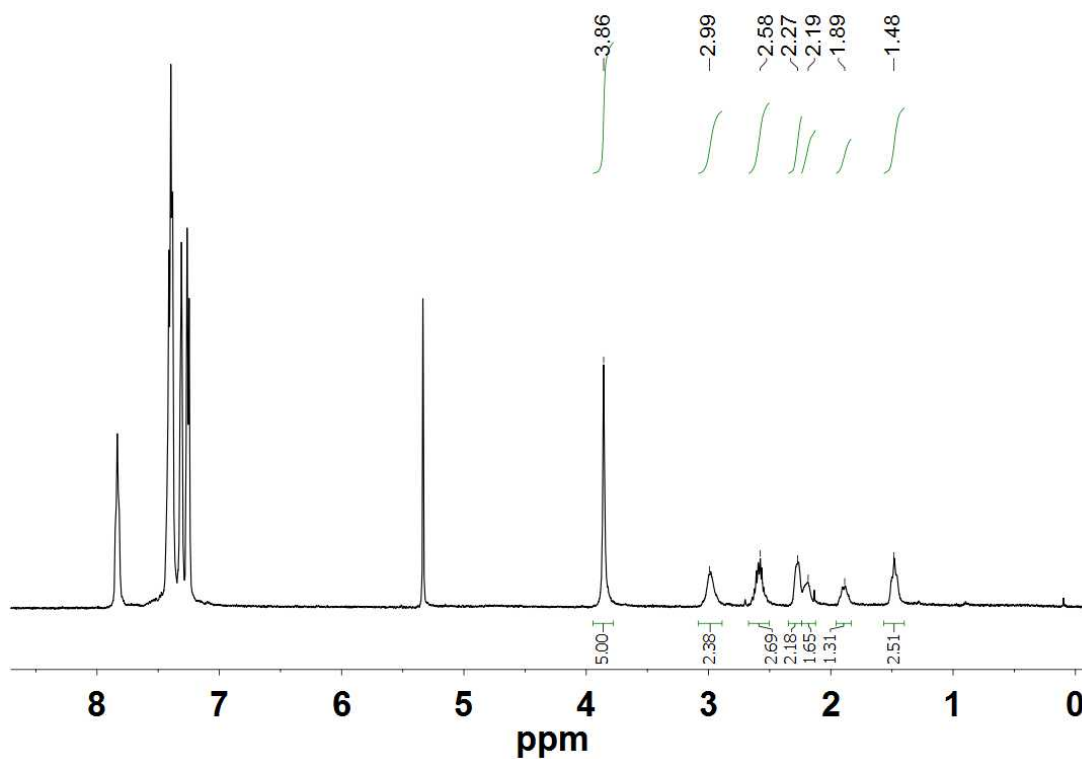

**Figure S47.**  $^1\text{H}$  NMR spectrum of  $\text{CpCo}(\text{pdt})\text{Fe}(\text{CO})(\text{dppe})$  (**4d**) in  $\text{CD}_2\text{Cl}_2$  solution.

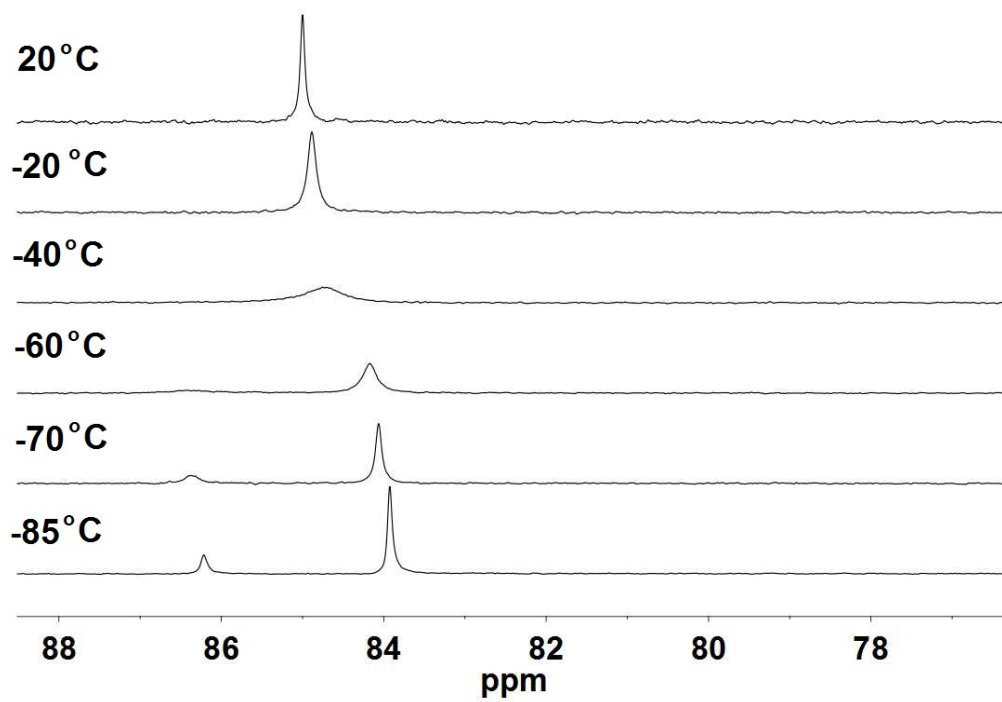

**Figure S48.**  $^{31}\text{P}$  NMR spectrum of  $\text{CpCo(pdt)Fe(CO)(dppe)}$  (**4d**) in  $\text{CD}_2\text{Cl}_2$  solution at various temperatures.

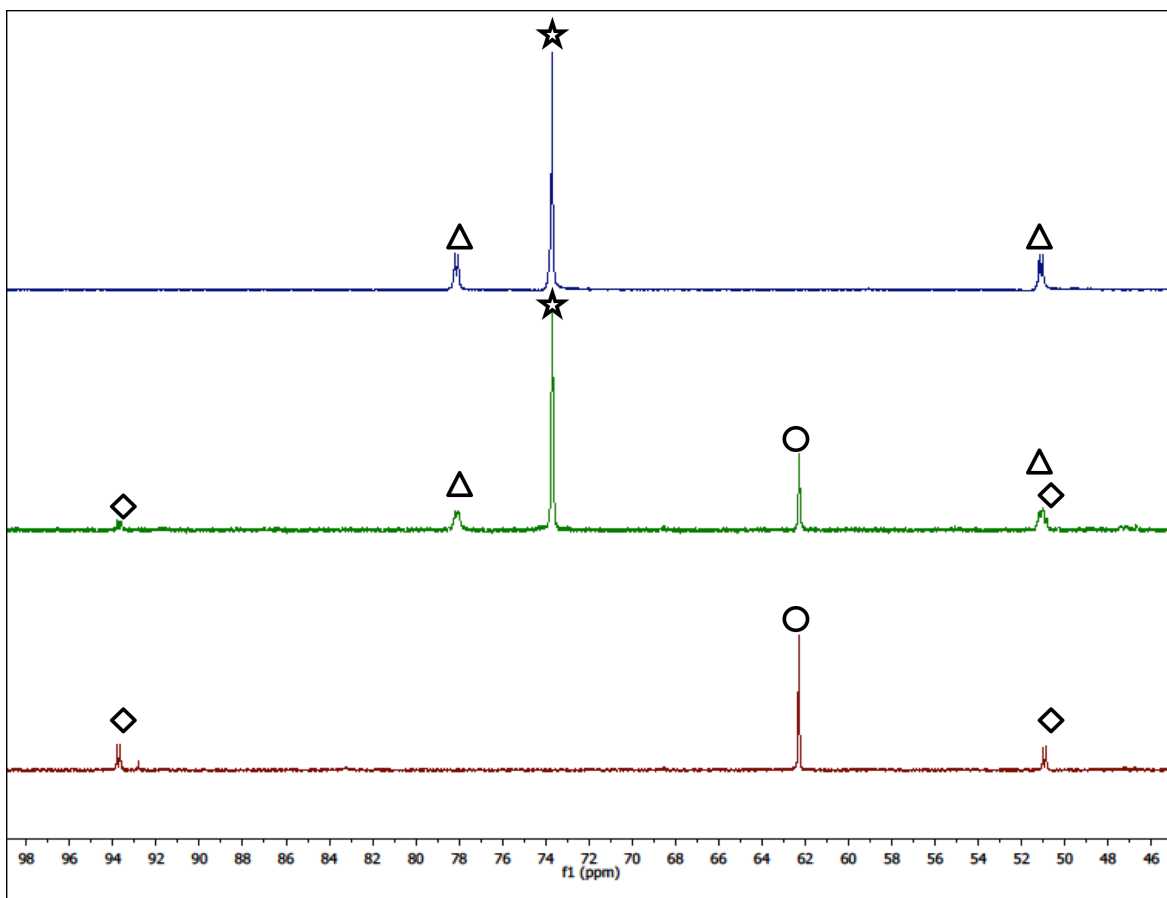

**Figure S49.**  $^{31}\text{P}$  NMR spectra related to the reaction of  $\text{Fe}(\text{pdt})(\text{CO})_2(\text{dppe})$  (**1d**) and  $\text{CpCo}(\text{CO})\text{I}_2$  to give  $[\text{CpCoI}(\text{pdt})\text{Fe}(\text{CO})(\text{dppe})]\text{I}$  ( $\text{CD}_2\text{Cl}_2$  solutions):

Top: *unsym-1d* (triangle) and *sym-1d* (star).

Middle: **1d** +  $\text{CpCo}(\text{CO})\text{I}_2$  after 30 min. (diamond = *unsym*- $[\text{CpCoI}(\text{pdt})\text{Fe}(\text{CO})(\text{dppe})]^+$ , circle = *sym*- $[\text{CpCoI}(\text{pdt})\text{Fe}(\text{CO})(\text{dppe})]^+$ ).

Bottom: Same mixture as in middle spectrum, but recorded after a total of 100 min.

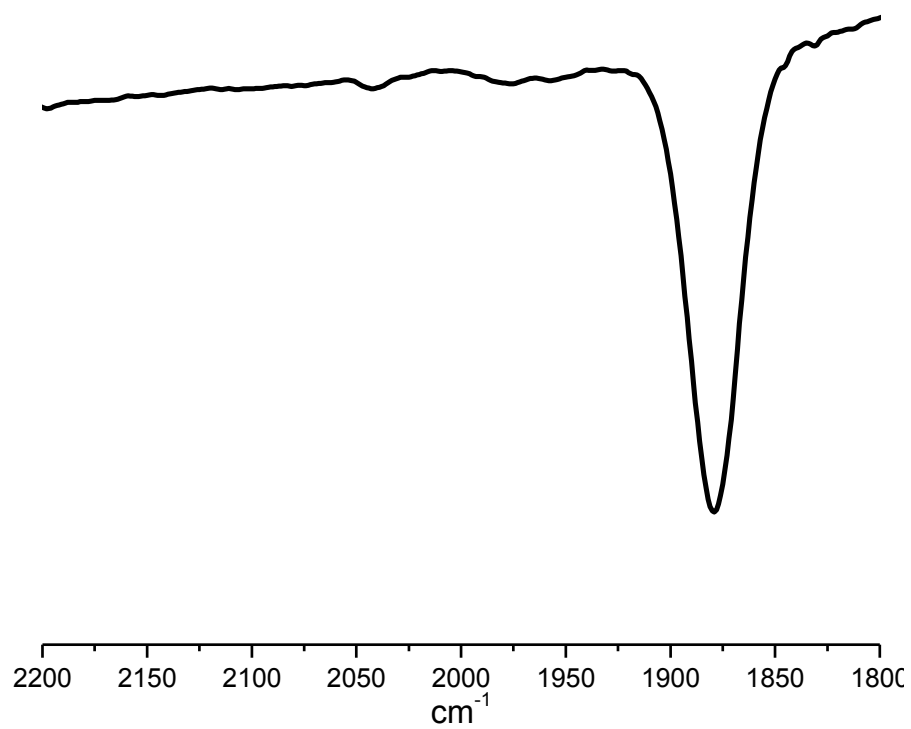

**Figure S50.** IR spectrum of  $\text{CpCo(pdt)Fe(CO)(dppe)}$  (**4d**) in  $\text{CH}_2\text{Cl}_2$ .

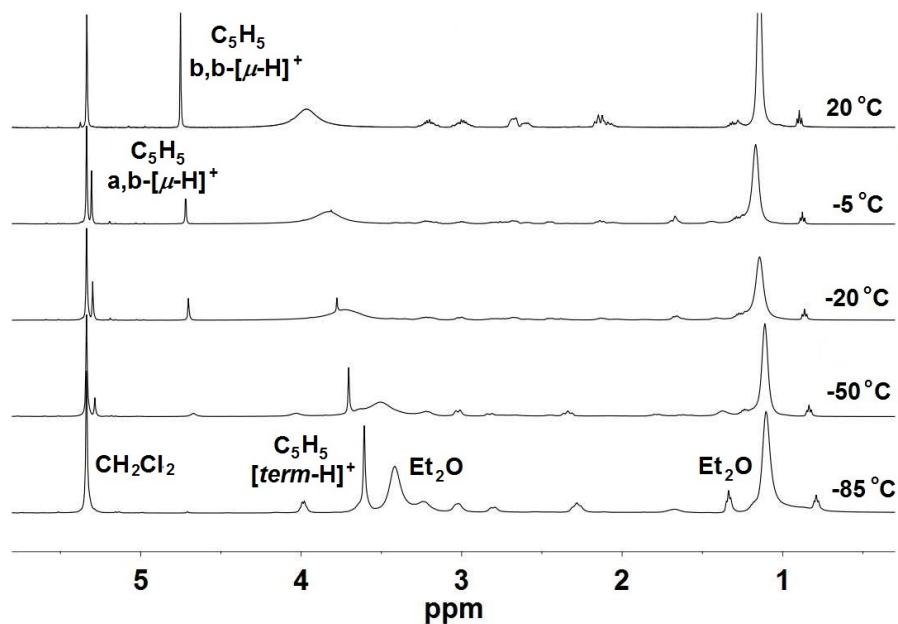

**Figure S51.** Low field portion of  $^1\text{H}$  NMR spectra for the low-temperature ( $-85\text{ }^\circ\text{C}$ ) protonation of  $\text{CpCo}(\text{pdt})\text{Fe}(\text{CO})(\text{dppe})$  (**4d**) with one equiv  $[\text{H}(\text{OEt}_2)_2]\text{BAR}^{\text{F}_4}$  in  $\text{CD}_2\text{Cl}_2$  followed by warming to the indicated temperatures. For the high field portion of the same spectra, see Figure 9 in the paper.



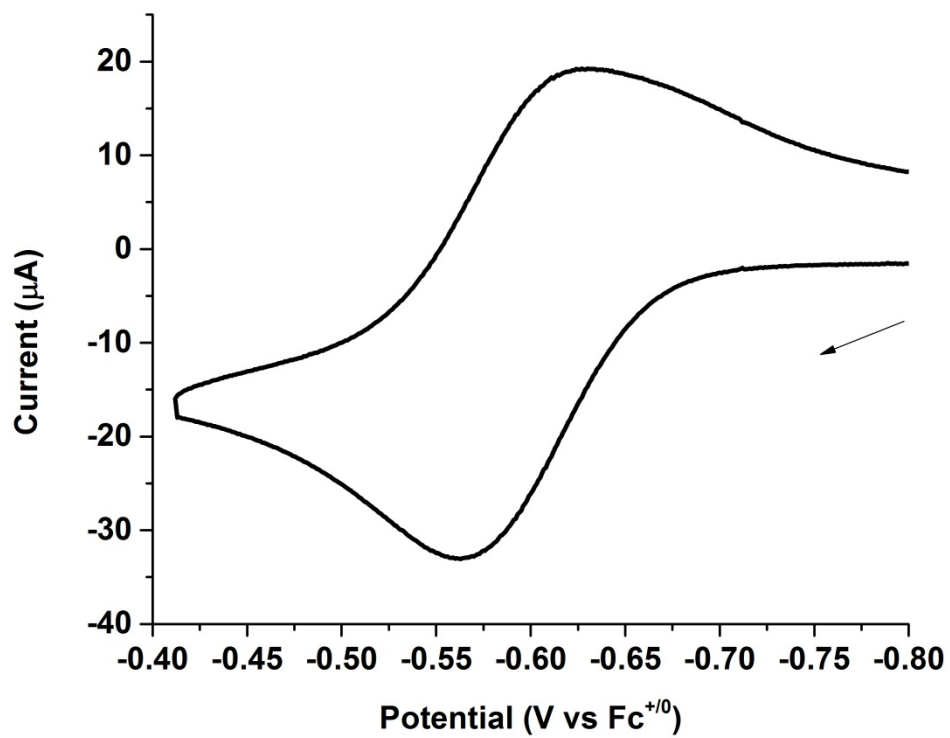

**Figure S52.** Cyclic voltammogram of CpCo(pdt)Fe(CO)<sub>2</sub>(dppe) (**4d**) in CH<sub>2</sub>Cl<sub>2</sub>.  
*Conditions:* See Figure S42.

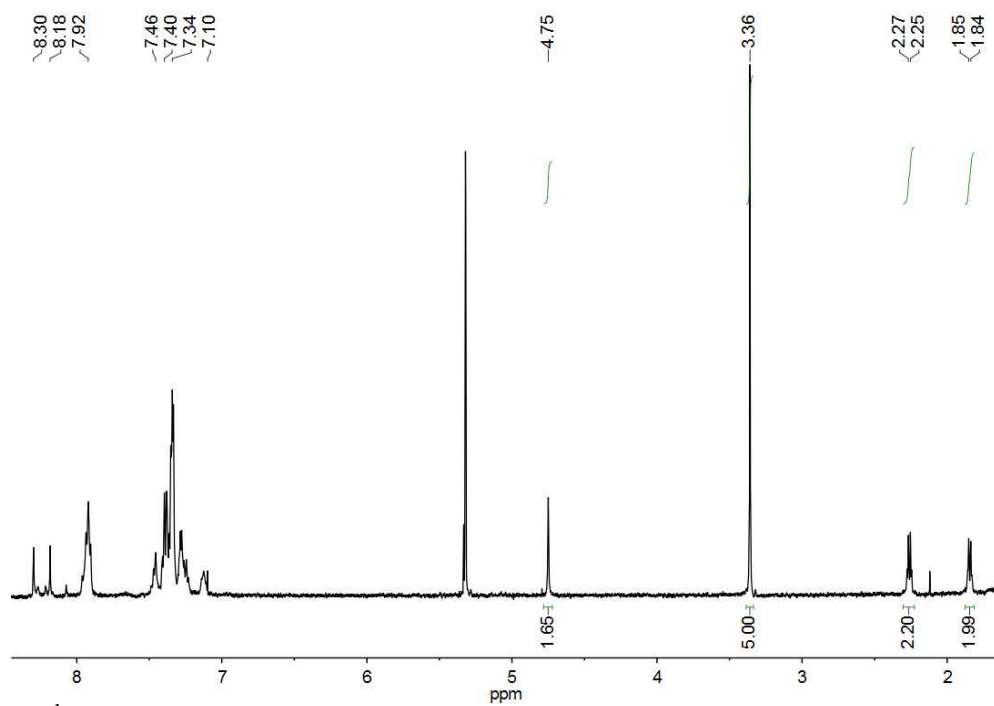

**Figure S53.**  $^1\text{H}$  NMR spectrum of  $\text{CpCo}(\text{edt})\text{Fe}(\text{CO})(\text{dppv})$  (**4a**) in  $\text{CD}_2\text{Cl}_2$ .

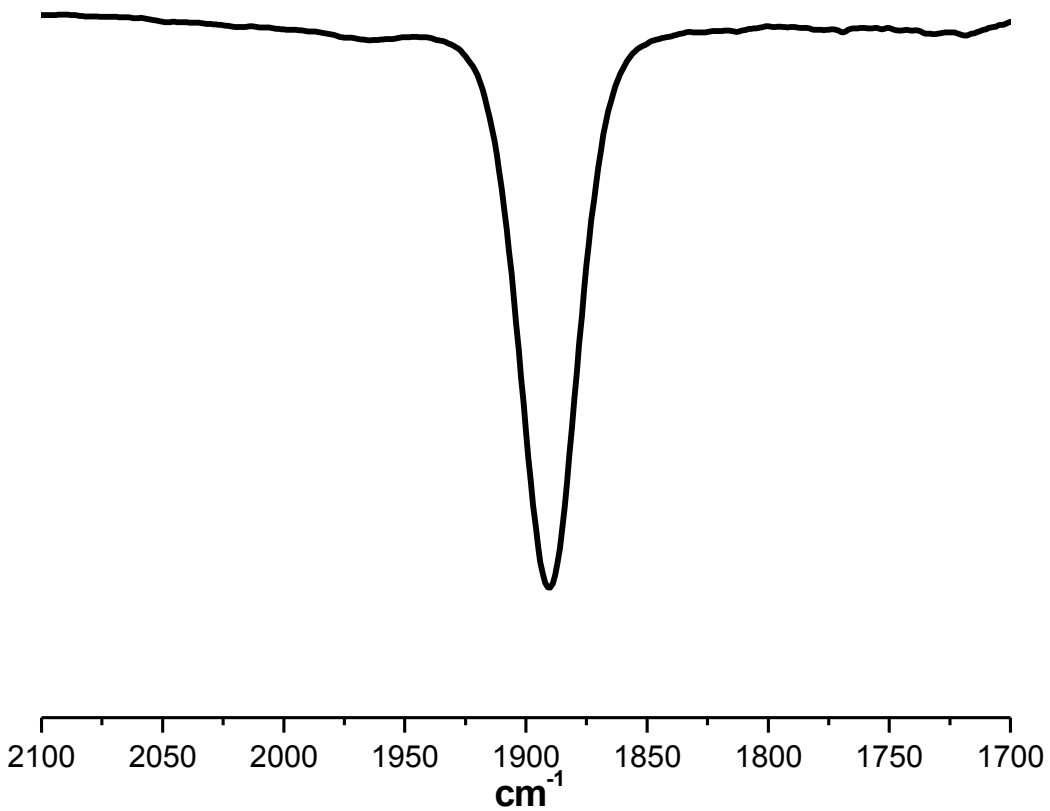

**Figure S54.** IR spectrum of  $\text{CpCo}(\text{edt})\text{Fe}(\text{CO})(\text{dppv})$  (**4a**) in  $\text{CH}_2\text{Cl}_2$ .
